# Supplementary material for: Development and pilot scale implementation of safe aerobic Cu/TEMPO oxidation in a batch reactor
Source: Royal Society of Chemistry journal article supplement (doi:10.1039/d3gc00579h), 2023-01-01
Supplement: d3gc00579h1.pdf [file d3gc00579h1.pdf]

## Supporting information

Development and pilot scale implementation of safe aerobic Cu/TEMPO oxidation in batch reactor.

Lemaitre Sylvain,<sup>a</sup> Romain Anne-Lise,<sup>a</sup> François Barriere,<sup>a</sup> Anthony Craquelin,<sup>a</sup> Chloé Copin<sup>a\*</sup> and  
Alexandre Jean.<sup>a\*</sup>

<sup>a</sup>Oril Industrie, Industrial Research Centre, 13 rue Desgenétais, 76210, Bolbec, France

Corresponding authors: [alexandre.jean@servier.com](mailto:alexandre.jean@servier.com); [chloe.copin@servier.com](mailto:chloe.copin@servier.com)

### **Table of contents**

|                                                                                               |    |
|-----------------------------------------------------------------------------------------------|----|
| 1. General Remarks.....                                                                       | 2  |
| 2. Analytical method for UPLC analysis.....                                                   | 2  |
| 3. Screening of conditions.....                                                               | 3  |
| 4. Development of aerobic copper oxidation .....                                              | 5  |
| 4.1 Screening of solvents .....                                                               | 5  |
| 4.2 Screening of Copper catalyst .....                                                        | 5  |
| 4.3 Screening of additives .....                                                              | 6  |
| 4.4 Air inlet system impact .....                                                             | 7  |
| 4.5 Impact of dilution.....                                                                   | 8  |
| 4.6 Impact of catalyst loading .....                                                          | 9  |
| 5. DDQ oxidation of (4-fluorobenzothiophen-2-yl) methanol 2 .....                             | 10 |
| 6. Pilot plant aerobic oxidation of (4-fluorobenzothiophen-2-yl) methanol 2 .....             | 11 |
| 6.1 Representative procedure .....                                                            | 11 |
| 6.2 Manufacturing campaign resume .....                                                       | 13 |
| 7. NMR spectra.....                                                                           | 13 |
| 7.1 (4-fluorobenzothiophen-2-yl)methanol <b>1</b> : match with reported literature data ..... | 13 |
| 8. Liquid chromatography spectra .....                                                        | 19 |
| 9. DSC analysis.....                                                                          | 20 |

|                                                 |    |
|-------------------------------------------------|----|
| 9.1 Calculation method for TMRad and TD24 ..... | 20 |
| 9.2 DSC Spectra .....                           | 20 |
| 10. Calorimetric study .....                    | 25 |
| 10.1 Apparatus .....                            | 25 |
| 10.2 EasyMax report .....                       | 26 |
| 10.2.1 Calorimetric experiment .....            | 26 |
| 10.2.2 Air supply impact evaluation .....       | 28 |
| 11. Green metrics calculation .....             | 30 |
| 12. Scope of the method .....                   | 32 |

## 1. General Remarks

All reagents and solvents were purchased from commercial suppliers and used without further purification. Reactions were monitored for completion by removing a small sample from the reaction mixture and analysing by UPLC (Waters ACQUITY). Proton nuclear magnetic resonance ( $^1\text{H}$  NMR) were reported at ambient temperature on a Bruker 400 MHz spectrometer. J-modulated spin-echo (JMOD) were recorded at ambient temperature on a Bruker 101 MHz spectrometer. Chemical shifts are reported relative to the residual protons in DMSO ( $\delta\text{H}$  2.50 ppm) and coupling constants (J) are given in Hertz. Chemical shifts of JMOD were measured in ppm and quoted to the nearest 0.1 ppm relative to the residual solvent peaks in DMSO ( $\delta\text{C}$  39.50 ppm). Data are reported as follows: Chemical shift (multiplicity, number of protons, coupling constants). Chemical shift was measured in ppm and quoted to the nearest 0.01 ppm. Coupling constants were quoted to the nearest 0.1 Hz and multiplicity reported according to the following convention: s = singlet, d = doublet, t = triplet, q = quartet, qn = quintet, sept = septet, m = multiplet, br = broad. Where coincident coupling constants have been observed, the apparent (app) multiplicity of the proton resonance has been reported.

DSC measurements were performed using a SETARAM DSC 121 calorimeter in stainless steel pans and were hermetically sealed. The sample (10 mg) were heated from 20 °C to a temperature in the range of 400 °C at a rate of 5 °C min<sup>-1</sup>. Onset temperatures were calculated by the instrument software.

## 2. Analytical method for UPLC analysis

|          |                                                                             |
|----------|-----------------------------------------------------------------------------|
| Column   | <b>Acquity UPLC BEH C18 – 50 mm x 2.1 mm – 1.7 <math>\mu\text{m}</math></b> |
| Eluent A | Water/CH <sub>3</sub> CN/ methane sulfonic acid (1000/25/1)                 |
| Eluent B | CH <sub>3</sub> CN/water/methane sulfonic acid (1000/25/1)                  |
| Flow     | 0.8 ml/min                                                                  |
| Oven     | 40°C                                                                        |

|                          |        |
|--------------------------|--------|
| Detection $\lambda$ (nm) | 210 nm |
|--------------------------|--------|

**Table S1:** UPLC analytical method used in this report.

The following gradient was used:

| Time (min) | Solvent A % | Solvent B % |
|------------|-------------|-------------|
| 0          | 95          | 5           |
| 1          | 95          | 5           |
| 4.5        | 5           | 95          |
| 5.5        | 5           | 95          |
| 5.6        | 95          | 5           |
| 7.6        | 95          | 5           |

**Table S2:** Elution system used in UPLC analytical method.

### 3. Screening of conditions

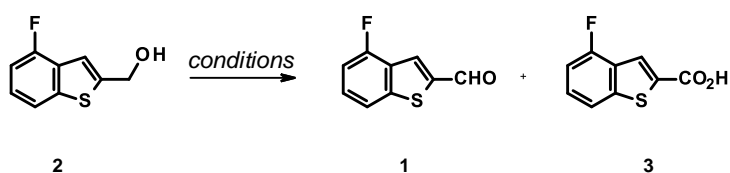

| Entry | Conditions                                                         | Alcohol 2 (%) <sup>a</sup> | Aldehyde 1 (%) <sup>a</sup> | Carboxylic Acid 3 (%) <sup>a</sup> | By Products <sup>a</sup> |
|-------|--------------------------------------------------------------------|----------------------------|-----------------------------|------------------------------------|--------------------------|
| 1     | TEMPO/ KBr/NaOCl<br>(NaHCO <sub>3</sub> , PH = 9.5), DCM, 7h, 0°C. | 0                          | 85                          | 0                                  | 15                       |
| 2     | TEMPO/NaOCl<br>(NaHCO <sub>3</sub> , pH = 9.5), 0°C, 7h.           | 68                         | 19                          | 0                                  | 13                       |
| 3     | TCCA, TEMPO, MeOH, 20°C.                                           | 0                          | 1                           |                                    | 99                       |
| 4     | <i>t</i> -BuONa<br>PhCOPh, 100°C, 18h.                             | 37                         | 1                           |                                    | 62                       |
| 5     | SO <sub>3</sub> -Pyridine, Et <sub>3</sub> N, 12°C, 7h.            | 98                         | 0                           |                                    | 2                        |
| 6     | DMSO-TFAA, Et <sub>3</sub> N,<br>-15°C, 7h.                        | 13                         | 66                          |                                    | 21                       |
| 7     | DMSO, Ac <sub>2</sub> O, 80°C.                                     | 0                          | 36                          |                                    | 64                       |

|           |                                                                                                                                                |    |    |    |     |
|-----------|------------------------------------------------------------------------------------------------------------------------------------------------|----|----|----|-----|
| <b>8</b>  | TEMPO (0.05 equiv.), Na <sub>2</sub> CO <sub>3</sub> (1 equiv.),<br>CuI (0.05 equiv.), L-proline (0.05<br>equiv.), MeOH, r.t., 60h, air.       | 1  | 52 | 30 | 18  |
| <b>9</b>  | TEMPO (0.05 equiv.), Na <sub>2</sub> CO <sub>3</sub> (1 equiv.),<br>CuI (0.05 equiv.), N-Ph-glycine (0.05<br>equiv.), water, reflux, 39h, air. | 50 | 33 | 8  | N.D |
| <b>10</b> | TEMPO (0.05 equiv.), Na <sub>2</sub> CO <sub>3</sub> (1 equiv.),<br>CuBr (0.05 equiv.), proline (0.05<br>equiv.), MeOH, r.t., 20h, air.        | 31 | 45 | 19 | N.D |
| <b>11</b> | TEMPO (0.05 equiv.), HCl (0.1 equiv.),<br>NaNO <sub>2</sub> (0.05 equiv.), DCM, r.t., air.                                                     | 90 | 2  | 0  | N.D |
| <b>12</b> | ABNO (0.05 equiv.), HNO <sub>3</sub> (0.2 equiv.),<br>NaNO <sub>2</sub> (0.1 equiv.), MeCN, r.t., air.                                         | 42 | 55 | 0  | N.D |
| <b>13</b> | ABNO (0.05 equiv.), NaNO <sub>2</sub> (0.1 equiv.),<br>CH <sub>3</sub> CO <sub>2</sub> H, r.t., 77h, air.                                      | 16 | 81 | 0  | N.D |
| <b>14</b> | HNO <sub>3</sub> (1 equiv.), TFE, r.t., 20h, air.                                                                                              | 28 | 0  | 72 | N.D |
| <b>15</b> | V <sub>2</sub> O <sub>5</sub> (0.05 equiv.), K <sub>2</sub> CO <sub>3</sub> (0.5 equiv.),<br>toluene, reflux, 20h, air.                        | 95 | 0  | 0  | N.D |
| <b>16</b> | Pt/C (0.1 equiv.), Bi/C (0.1 equiv.), KOH,<br>MeCN, 40°C, 2h30.                                                                                | 61 | 6  | 32 | N.D |
| <b>17</b> | Pd(OAc) <sub>2</sub> (0.15 equiv.), pyridine (0.2<br>equiv.), toluene, 80°C, 22h, air.                                                         | 22 | 69 | 0  | N.D |
| <b>18</b> | Pd(OAc) <sub>2</sub> (0.15 equiv.), NaHCO <sub>3</sub> (2<br>equiv.), DMSO, 80°C, 21h, air.                                                    | 63 | 23 | 0  | N.D |
| <b>19</b> | PdCl <sub>2</sub> (0.01 equiv.), NaOAc (0.5 equiv.),<br>P.C, 100°C, 4h, air.                                                                   | 88 | 8  | 0  | N.D |
| <b>20</b> | Pd(OAc) <sub>2</sub> (0.15 equiv.), pyridine (0.2<br>equiv.), DMSO, 80°C, 72h, air.                                                            | 79 | 15 | 0  | N.D |
| <b>21</b> | Pt/C (0.1 equiv.), Bi <sub>2</sub> O <sub>3</sub> (0.1 equiv.),<br>NaOH, H <sub>2</sub> O, 45°C, 24h, air.                                     | 88 | 8  | 0  | N.D |
| <b>22</b> | Pt/C (0.1 equiv.), Bi <sub>2</sub> O <sub>3</sub> (0.1 equiv.),<br>Pd/C (0.1 equiv.), picolinic acid, AcOH,<br>pyridine, 100°C, 24h.           | 76 | 13 | 0  | N.D |

|           |                                                                                                                                                                                    |    |    |   |     |
|-----------|------------------------------------------------------------------------------------------------------------------------------------------------------------------------------------|----|----|---|-----|
| <b>23</b> | Na <sub>2</sub> WO <sub>4</sub> ·2H <sub>2</sub> O (0.005 equiv.), (n-oct) <sub>3</sub> MeNHSO <sub>4</sub> (0.005 equiv.), H <sub>2</sub> O <sub>2</sub> (1.1 equiv.), 70°C, 16h. | 31 | 0  | 0 | N.D |
| <b>24</b> | TEMPO (0.1 equiv.), CuCl (0.1 equiv.), DMSO, r.t., air (open flask).                                                                                                               | 0  | 92 | 4 | N.D |

**Table S3:** Screening of oxidation methods for conversion of alcohol **1** into aldehyde **2**; a. Conversion was determined by Liquid Chromatography (relative % area).

## 4. Development of aerobic copper oxidation

### 4.1 Screening of solvents

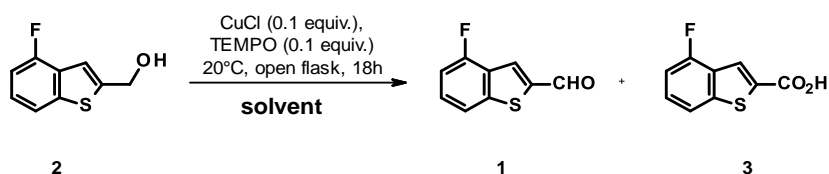

#### Procedure:

Alcohol **2** (200 mg, 1.1 mmol, 1 equiv.), CuCl (11 mg, 0.11 mmol, 0.1 equiv.), TEMPO (18 mg, 0.11 mmol, 0.1 equiv.) and solvent (4 mL) were charged in 10 ml three necks round bottom flask. Reaction mixture was stirred open flask at 20°C during 18h and was analysed to give the conversion.

| <b>Solvent</b>                    | <b>Alcohol 2 (%)<sup>a</sup></b> | <b>Aldehyde 1 (%)<sup>a</sup></b> | <b>Carboxylic acid 3 (%)<sup>a</sup></b> |
|-----------------------------------|----------------------------------|-----------------------------------|------------------------------------------|
| DMF                               | 5                                | 92                                | 0.5                                      |
| NBP                               | 1                                | 92.2                              | 2.9                                      |
| DMSO                              | 1                                | 91.2                              | 5.4                                      |
| EQUAMIDE M 100                    | 1.4                              | 93.8                              | 1.8                                      |
| PROPYLENE CARBONATE               | 9.4                              | 85.6                              | 2.3                                      |
| ACETIC ACID                       | 98                               | 2                                 | 0                                        |
| ETHYL ACETATE                     | 96                               | 4                                 | 0                                        |
| M-THP                             | 94                               | 3                                 | 0                                        |
| DIMETHOXYETHANE                   | 96                               | 3                                 | 0                                        |
| ACETONITRILE                      | 95                               | 3                                 | 0                                        |
| H <sub>2</sub> O                  | 95                               | 5                                 | 0                                        |
| DMSO/H <sub>2</sub> O (40/60 v/v) | 89                               | 10                                | 0                                        |

**Table S4:** Screening of solvents; a. Conversion was determined by Liquid Chromatography (relative % area).

### 4.2 Screening of Copper catalyst

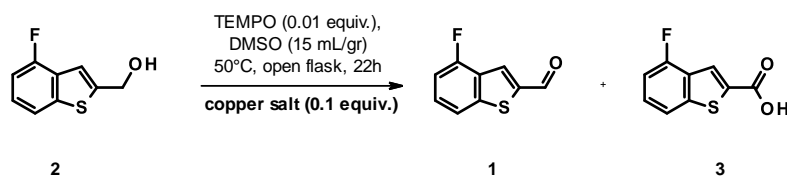

**Procedure:**

Alcohol **2** (1 g, 5.5 mmol, 1 equiv.), copper salt (0.11 mmol, 0.1 equiv.), TEMPO (8.6 mg, 0.055 mmol, 0.01 equiv.) and DMSO (15 mL) were charged in 50 mL three necks round bottom flask. Reaction mixture were purged for 2 minutes with air and stirred open flask, at 50°C, for 22h under magnetic stirring before to be analysed to give the conversion.

| Copper salt                                                                                                  | Alcohol <b>2</b> (%) <sup>a</sup> | Aldehyde <b>1</b> (%) <sup>a</sup> | Carboxylic acid <b>3</b> (%) <sup>a</sup> |
|--------------------------------------------------------------------------------------------------------------|-----------------------------------|------------------------------------|-------------------------------------------|
| CuCl                                                                                                         | 3.3                               | 90.9                               | 3.8                                       |
| CuBr                                                                                                         | 100                               | 0                                  | 0                                         |
| CuBr.DMS <sup>b</sup>                                                                                        | Not detected                      | >95                                | Not quantify                              |
| CuI                                                                                                          | 3.5                               | 90.4                               | 4                                         |
| CuOTf.toluene                                                                                                | 3.3                               | 87                                 | 5                                         |
| CuBr <sub>2</sub>                                                                                            | 95                                | 0                                  | 1.8                                       |
| CuCl <sub>2</sub>                                                                                            | 95                                | 0                                  | 1.8                                       |
| CuOTf <sub>2</sub>                                                                                           | 92.7                              | 1.3                                | 2                                         |
| CuBr <sub>2</sub> , proline (0.1 equiv.), Na <sub>2</sub> CO <sub>3</sub> (1 equiv.) H <sub>2</sub> O, 100°C | 0                                 | 0                                  | 95                                        |

**Table S5:** Screening of copper salts; a. Conversion was determined by Liquid Chromatography (relative % area); b. Determined by TLC monitoring.

**4.3 Screening of additives**

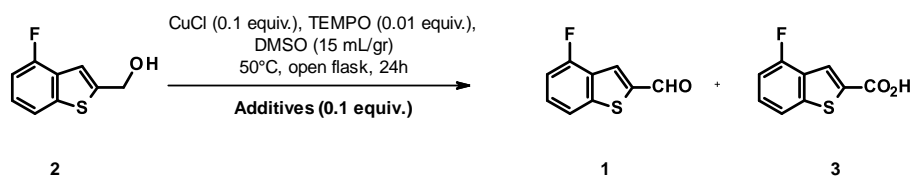

**Procedure:**

Alcohol **1** (1 g, 5.5 mmol, 1 equiv.), CuCl (54 mg, 0.55 mmol, 0.1 equiv.), TEMPO (8.6 mg, 0.055 mmol, 0.01 equiv.) and DMSO (15 mL) were charged in 50 ml three necks round bottom flask. Reaction mixture were purged for 2 minutes with air and stirred open flask, at 50°C, for 24h under magnetic stirring before to be analysed to give the conversion.

| Ligand/base           | Alcohol <b>2</b> (%) <sup>a</sup> | Aldehyde <b>1</b> (%) <sup>a</sup> | Carboxylic acid <b>3</b> (%) <sup>a</sup> |
|-----------------------|-----------------------------------|------------------------------------|-------------------------------------------|
| NMI                   | 3                                 | 88                                 | 5                                         |
| DBU                   | 26                                | 67                                 | 4.1                                       |
| BiPyridine            | 2.6                               | 89                                 | 6                                         |
| MeO <sub>2</sub> BiPy | 1.7                               | 76                                 | 5.6                                       |

|                                 |      |      |     |
|---------------------------------|------|------|-----|
| Phenanthroline                  | 5.8  | 86.9 | 5.8 |
| Proline                         | 94.6 | 0    | 1.7 |
| Cs <sub>2</sub> CO <sub>3</sub> | 77.9 | 16.8 | 2.4 |
| K <sub>3</sub> PO <sub>4</sub>  | 65   | 29.8 | 2.5 |
| <i>t</i> -BuOK                  | 57.7 | 36.7 | 3.2 |
| K <sub>2</sub> CO <sub>3</sub>  | 0    | 95   | 2   |
| DMAP                            | 0    | 94   | 4   |

**Table S6:** Screening of additives; a. Conversion was determined by Liquid Chromatography (relative % area).

#### 4.4 Air inlet system impact

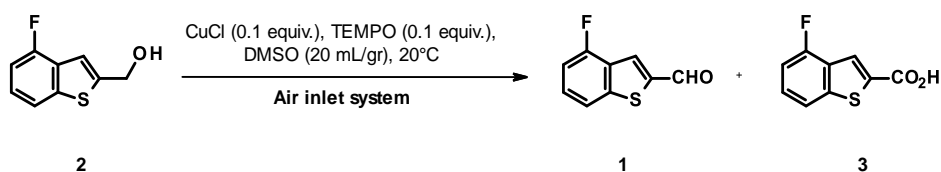

#### Procedure:

Alcohol **1** (1 g, 5.5 mmol, 1 equiv.), CuCl (54 mg, 0.55 mmol, 0.1 equiv.), TEMPO (86 mg, 0.55 mmol, 0.1 equiv.) and DMSO (20 mL) were charged in 50 mL three necks round bottom flask. Reaction mixture was stirred (magnetic stirring, 1400 rpm) in presence of air (see table S7 for detail) and at 20°C until maximum of conversion which was determined by UPLC analysis.

| Air inlet                                              | Time (minutes) | Aldehyde <b>1</b> (%) <sup>a</sup> | Alcohol <b>2</b> (%) <sup>a</sup> | Carboxylic Acid <b>3</b> (%) <sup>a</sup> |
|--------------------------------------------------------|----------------|------------------------------------|-----------------------------------|-------------------------------------------|
| 0.5N/L air Bubbling                                    | 0              | 0                                  | 100                               | 0                                         |
|                                                        | 45             | 44                                 | 55.9                              | 0.2                                       |
|                                                        | 100            | 95                                 | 4.5                               | 0.8                                       |
| Open flask                                             | 0              | 0                                  | 100                               | 0                                         |
|                                                        | 25             | 6                                  | 94                                | 0                                         |
|                                                        | 89             | 17.9                               | 92                                | 0.1                                       |
|                                                        | 162            | 36.2                               | 63.6                              | 0.2                                       |
|                                                        | 226            | 49.1                               | 51.4                              | 0.4                                       |
|                                                        | 360            | 86.1                               | 12                                | 0.9                                       |
|                                                        | 415            | 96.9                               | 1.6                               | 1.4                                       |
| 0,5NL/min air bubbling, 1,5NL/min N <sub>2</sub> sweep | 0              | 0                                  | 100                               | 0                                         |
|                                                        | 10             | 5                                  | 95                                | 0                                         |
|                                                        | 22             | 10.6                               | 89.4                              | 0                                         |
|                                                        | 58             | 41.5                               | 58.3                              | 0.2                                       |
|                                                        | 98             | 80.7                               | 18.7                              | 0.5                                       |
|                                                        | 121            | 97.4                               | 0.6                               | 1                                         |

**Table S7:** Impact of air inlet system; a. Conversion was determined by Liquid Chromatography (relative % area).

#### 4.5 Impact of dilution

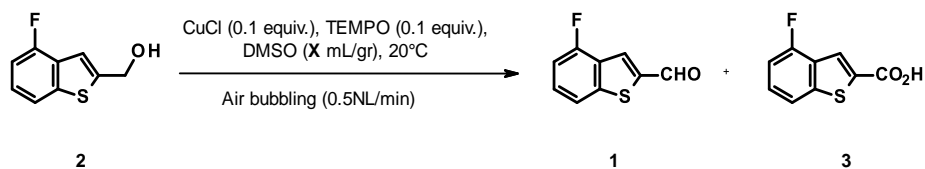

#### Procedure:

Alcohol **2** (1 g, 5.5 mmol, 1 equiv.), CuCl (54 mg, 0.55 mmol, 0.1 equiv.), TEMPO (86 mg, 0.55 mmol, 0.1 equiv.) and DMSO (X mL, see table S8) were charged in 50 mL three necks round bottom flask. Reaction mixture was stirred (magnetic stirring, 1400 rpm) in presence of air (air bubbling through reaction mixture, 0.5NL/min) and at 20°C until maximum of conversion.

| Dilution | Time (minutes) | Aldehyde <b>1</b> (%) <sup>a</sup> | Alcohol <b>2</b> (%) <sup>a</sup> | Carboxylic Acid <b>3</b> (%) <sup>a</sup> |
|----------|----------------|------------------------------------|-----------------------------------|-------------------------------------------|
| 20 mL/gr | 0              | 0                                  | 100                               | 0                                         |
|          | 20             | 14                                 | 86                                | 0                                         |
|          | 45             | 44                                 | 55.9                              | 0.2                                       |
|          | 70             | 59                                 | 40                                | 0.3                                       |
|          | 100            | 95                                 | 4.50                              | 0.8                                       |
|          | 120            | 98                                 | 1.2                               | 1                                         |
| 15 mL/gr | 0              | 0                                  | 100                               | 0                                         |
|          | 20             | 26.5                               | 73.3                              | 0.1                                       |
|          | 50             | 79                                 | 20.6                              | 0.7                                       |
|          | 75             | 97.4                               | 1.3                               | 1.2                                       |
|          | 180            | 97                                 | 1.4                               | 1.95                                      |
| 10 mL/gr | 0              | 0                                  | 100                               | 0                                         |
|          | 20             | 29.5                               | 70.3                              | 0                                         |
|          | 40             | 69.5                               | 30                                | 0.5                                       |
|          | 60             | 95.2                               | 3.7                               | 1.1                                       |
|          | 80             | 97.3                               | 1.3                               | 1.4                                       |
| 5 mL/gr  | 0              | 0                                  | 100                               | 0                                         |
|          | 20             | 37.9                               | 61.8                              | 0.2                                       |
|          | 40             | 72.7                               | 26.6                              | 0.7                                       |
|          | 60             | 96.8                               | 1.5                               | 1.6                                       |
|          | 80             | 96.4                               | 1.3                               | 2.2                                       |

**Table S8:** Impact of dilution; a. Conversion was determined by Liquid Chromatography (relative % area).



#### 4.6 Impact of catalyst loading

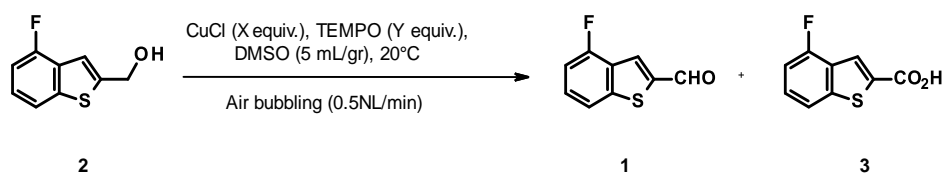

##### Procedure:

Alcohol **2** (1 g, 5.5 mmol, 1 equiv.), CuCl (X equiv., see table S9), TEMPO (Y equiv., see table S9) and DMSO (5 mL) was charged in 25 mL three necks round bottom flask. Reaction mixture was stirred (magnetic stirring, 1400 rpm) in presence of air (air bubbling through reaction mixture, 0.5NL/min) and at 20°C until maximum of conversion.

| CuCl (equiv.) | Tempo (equiv.) | Time (minutes) | Aldehyde <b>1</b> (%) <sup>a</sup> | Alcohol <b>2</b> (%) <sup>a</sup> | Acide <b>3</b> (%) <sup>a</sup> |
|---------------|----------------|----------------|------------------------------------|-----------------------------------|---------------------------------|
| 0.1           | 0.1            | 0              | 0                                  | 100                               | 0                               |
|               |                | 20             | 37.9                               | 61.8                              | 0.2                             |
|               |                | 40             | 72.7                               | 26.6                              | 0.7                             |
|               |                | 60             | 96.8                               | 1.5                               | 1.6                             |
|               |                | 80             | 96.4                               | 1.33                              | 2.20                            |
| 0.1           | 0.05           | 0              | 0                                  | 100                               | 0                               |
|               |                | 10             | 16.3                               | 83.6                              | 0.08                            |
|               |                | 20             | 27.4                               | 72.4                              | 0.21                            |
|               |                | 40             | 56.1                               | 42.7                              | 0.6                             |
|               |                | 60             | 80.9                               | 17.4                              | 1.1                             |
|               |                | 80             | 96.7                               | 0.9                               | 1.8                             |
|               |                | 190            | 96.6                               | 0.4                               | 2.5                             |
| 0.1           | 0.01           | 0              | 0                                  | 100                               | 0                               |
|               |                | 20             | 20.1                               | 79.8                              | 0.1                             |
|               |                | 41             | 37.7                               | 62                                | 0.3                             |
|               |                | 60             | 53.1                               | 46.3                              | 0.6                             |
|               |                | 80             | 66.9                               | 32.2                              | 0.9                             |
|               |                | 102            | 80.6                               | 18.1                              | 1.3                             |
|               |                | 120            | 87.1                               | 11.3                              | 1.6                             |
|               |                | 141            | 90.2                               | 8.1                               | 1.7                             |
|               |                | 180            | 93                                 | 5.1                               | 1.9                             |
|               |                | 240            | 94.9                               | 3.10                              | 2.0                             |
|               |                | 1140           | 97.0                               | 0.4                               | 2.6                             |
|               |                | 0              | 0                                  | 100                               | 0                               |
|               |                | 10             | 13.7                               | 86.3                              | 0                               |

|      |      |      |      |      |      |
|------|------|------|------|------|------|
| 0.2  | 0.01 | 20   | 24.7 | 75.2 | 0.1  |
|      |      | 40   | 45.7 | 54.0 | 0.3  |
|      |      | 60   | 65.6 | 33.9 | 0.5  |
|      |      | 80   | 83.2 | 15.6 | 0.83 |
|      |      | 100  | 94.4 | 4.3  | 1.2  |
|      |      | 120  | 96.5 | 2.1  | 1.4  |
|      |      | 180  | 98   | 0.7  | 1.6  |
|      |      | 1440 | 95.6 | 0.3  | 4.2  |
|      |      |      |      |      |      |
| 0.05 | 0.1  | 0    | 0    | 100  | 0    |
|      |      | 12   | 9.5  | 90.5 | 0.04 |
|      |      | 30   | 21.8 | 78.0 | 0.2  |
|      |      | 70   | 54.9 | 43.1 | 0.8  |
|      |      | 125  | 88.2 | 8.1  | 2.8  |
|      |      | 173  | 92.8 | 4.0  | 3.3  |
|      |      | 255  | 95.7 | 1.2  | 2.3  |
|      |      |      |      |      |      |
| 0.01 | 0.1  | 0    | 0    | 100  | 0    |
|      |      | 30   | 9.3  | 90.8 | 0    |
|      |      | 79   | 19.8 | 79.9 | 0.3  |
|      |      | 137  | 24.3 | 75.3 | 0.4  |
|      |      | 225  | 27.6 | 71.9 | 0.54 |
|      |      | 300  | 29.5 | 70.0 | 0.6  |
|      |      | 480  | 33.3 | 65.9 | 0.8  |
|      |      |      |      |      |      |
| 0.05 | 0.05 | 0    | 0    | 100  | 0    |
|      |      | 31   | 25.7 | 74.1 | 0.2  |
|      |      | 52   | 43   | 56.5 | 0.5  |
|      |      | 78   | 64.7 | 34.1 | 1.2  |
|      |      | 99   | 82.3 | 15.3 | 2.0  |
|      |      | 127  | 90.8 | 6.6  | 2.6  |
|      |      | 156  | 93.4 | 3.7  | 2.8  |
|      |      | 500  | 97.9 | 0.6  | 1.3  |

**Table S9:** Optimisation of catalyst loading; a. Conversion was determined by Liquid Chromatography (relative % area).

## 5. DDQ oxidation of (4-fluorobenzothiophen-2-yl) methanol 2

**Representative procedure:** In a pilot scale reactor were introduced alcohol **2** (12.5 Kg) and dichloromethane (120 Kg). DDQ (16 Kg) was added in one portion at 20-30°C and the reaction mixture could react under vigorous stirring for 16 hours at 20-30 °C (conversion controlled by TLC monitoring). The DDHQ was filtered off, re-slurred in dichloromethane (160 Kg) and filtered again. The combined filtrates were successively washed with saturated aqueous NaHCO<sub>3</sub> solution (4\*137.5 Kg) and with water (2\*80 Kg). Then, water (150 Kg) was added and the dichloromethane was evaporated in vacuum at 40°C. Another

charge of water (100 Kg) was added to the mixture and the resulting suspension was cooled to 20-25 °C, filtered off on pressure filter and dried in tray dryer in vacuum at 30-35°C for 8 hours (Drying endpoint was checked by determination of drying loss) to get aldehyde **1** with 80% yield (10 Kg).

**NB:** In some cases, reslurry was necessary to obtain targeted purity (ca >98%).

**Re-slurry procedure:**

Wet aldehyde **1** was suspended in di-isopropyl ether at 0-5°C (36 Kg), stirred and filtered off to give wet aldehyde **1** which was dried in tray dryer in vacuum at 30-35°C for 8 hours (Drying endpoint was checked by determination of drying loss) to get aldehyde **1** with required quality.

**Note:**

- This process was repeated 15 times with a range yield of 80-90% to manufacture around 150 Kg of aldehyde **2**.
- In some cases, reload of 1 Kg of DDQ was necessary to complete the reaction.
- Good stirring in the oxidation reaction is necessary.
- Re-slurry of the DDHQ is necessary to obtain good yield.

## 6. Pilot plant aerobic oxidation of (4-fluorobenzothiophen-2-yl) methanol **2**

### 6.1 Representative procedure

Reaction:

In a 80 L enamel reactor equipped with anchor, a multi-holes air inlet line dipping in reaction mixture and a "safety N<sub>2</sub> inlet" on the reactor dome were introduced alcohol **2** (7 Kg), CuCl (756 g), TEMPO (63 g) and DMSO (38.5 Kg). Reaction mixture was stirred at 20°C and air was introduced with a 60 NL/min flow rate through a multi-holes air inlet line. Reaction mixture was stirred under air bubbling until full conversion (determined by LC chromatography, < 0.5% of unreacted **2**) was observed. Then, air bubbling was stopped, nitrogen was introduced in the reactor and crude mixture was combined with two other batches for workup and isolation.

Workup and isolation:

In a 650 L enamel reactor equipped with an impeller were charged water (196 Kg) and ammonia (11N, 17.42 Kg) at 20°C. Then, DMSO solution of crude **1** (3 different batches coming from oxidation of 5.2 Kg, 7.29 Kg and 7.0 Kg of **2** were combined) was carefully added over 30 minutes to maintain internal reaction mixture below 22°C (exothermic addition). Then, reaction mixture was stirred at 20°C during 5h30 and the resulting blue suspension was filtered off. The crude cake was washed successively by water (2\*90 Kg) and HCl 1N (3\*95.6 Kg) and dried at 40°C under vacuum (4-40 mmbar) for 164 hours (KF<0.5%) to give 13.3 Kg of aldehyde **1** (68% yield, 97% LC purity) as yellow solid.

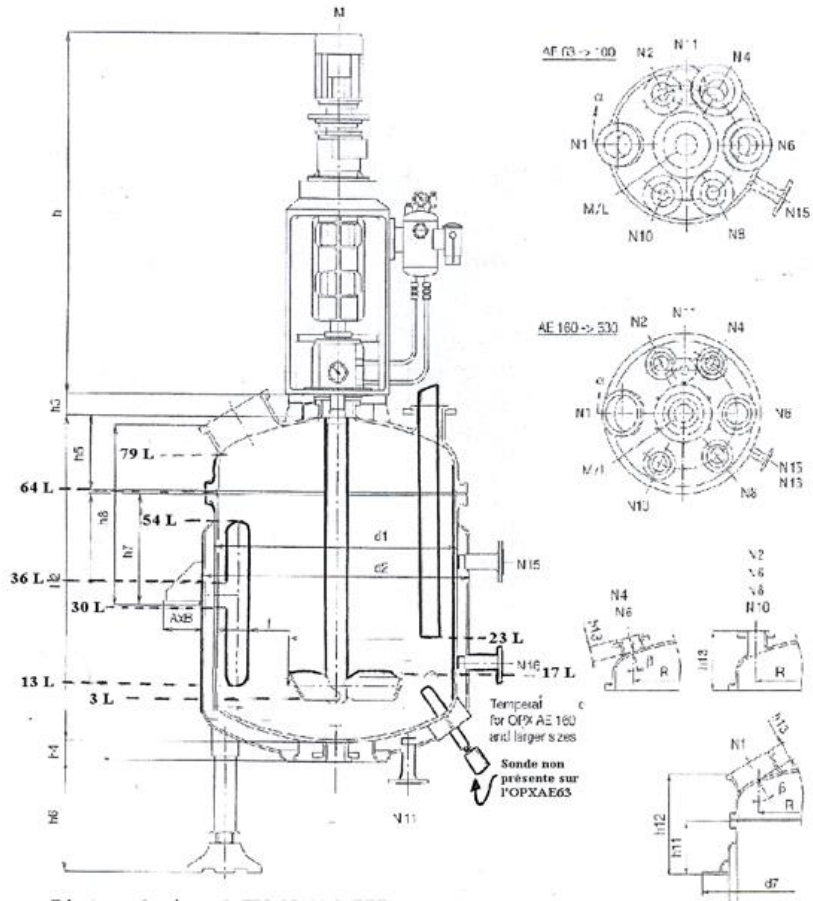

Fig. S1: Reactor used for the reaction

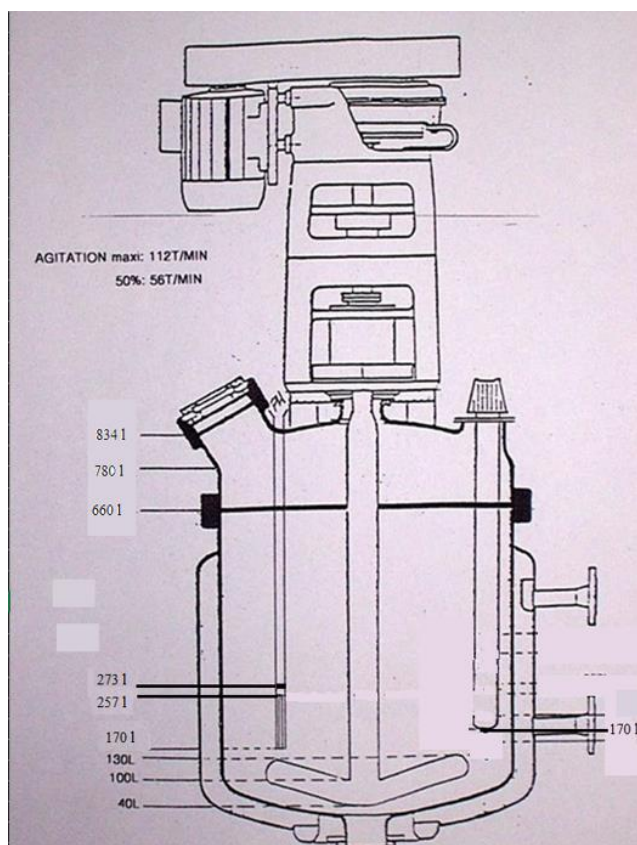

**Fig. S2:** Reactor used for workup and isolation.

## 6.2 Manufacturing campaign resume

| Scale (Kg of 2) | IPC <sup>a</sup> |       |       |       | Yield <sup>b</sup> | Purity (LC) <sup>a</sup> |
|-----------------|------------------|-------|-------|-------|--------------------|--------------------------|
|                 | Time (h)         | 2 (%) | 1 (%) | 3 (%) |                    |                          |
| 5.143           | 15h              | 0.3   | 90.1  | 9     | 69%                | 96.9%                    |
| 7.371           | 13               | 0.7   | 90.7  | 7.3   |                    |                          |
|                 | 17               | 0.3   | 90.9  | 7.5   |                    |                          |
| 7               | 8                | 6.4   | 86.7  | 4.9   |                    |                          |
|                 | 16               | 1.6   | 91.1  | 5.3   |                    |                          |
|                 | 32               | 0.2   | 91.6  | 5.9   |                    |                          |

**Table S10:** Resume of manufacturing campaign of aldehyde 1; a. Determined by liquid chromatography (method described in section 1); b. Isolation done by combining reaction mixture of those 3 batches.

## 7. NMR spectra

### 7.1 (4-fluorobenzothiophen-2-yl)methanol 2: match with reported literature data<sup>1</sup>

<sup>1</sup> (a) N. Matsunaga, T. Kaku, F. Itoh, T. Tanaka, T. Hara, H. Miki, M. Iwasaki, T. Aono, M. Yamaoka, M. Kusaka and A. Tasaka, *Bioorg. Med. Chem.*, 2004, **12**, 2251; (b) B. Petho, G. B. Szilágyi, B. Mengyel, T. Nagy, F. Farkas, K. Kátai-Fadgyas and B. Volk, *Org. Process Res. Dev.*, 2022, **26**, 1223.

44819 - AD2 - NP - fluorothinol - - NEO44819035 - NA - 1705A02005  
10 mg - DMSO - PEMN

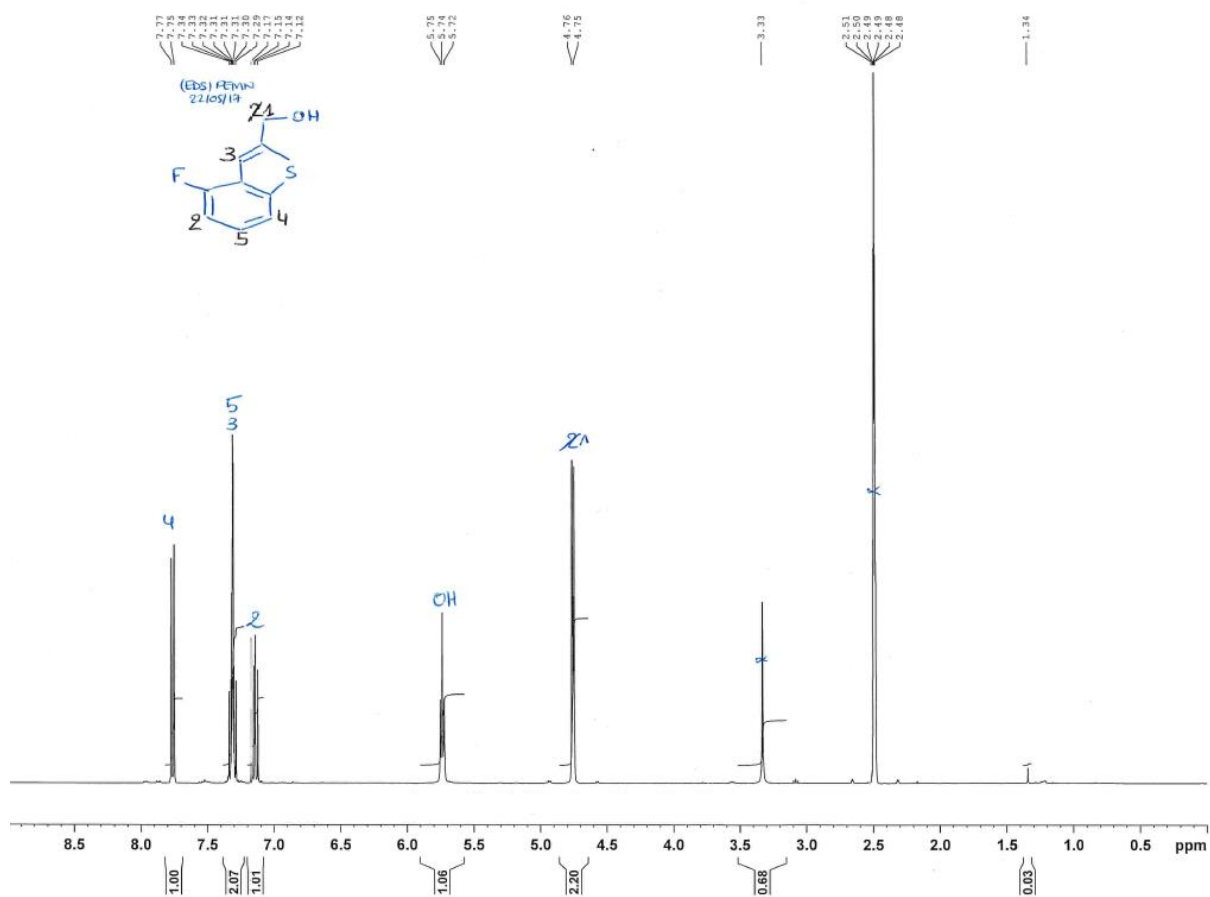

Fig. S3: Recorded  $^1\text{H}$  NMR spectra of alcohol 2.

44819 - AD2 - NP - fluorothinol - - NEO44819035 - NA - 1705A02005  
 10 mg - DMSO - PENN

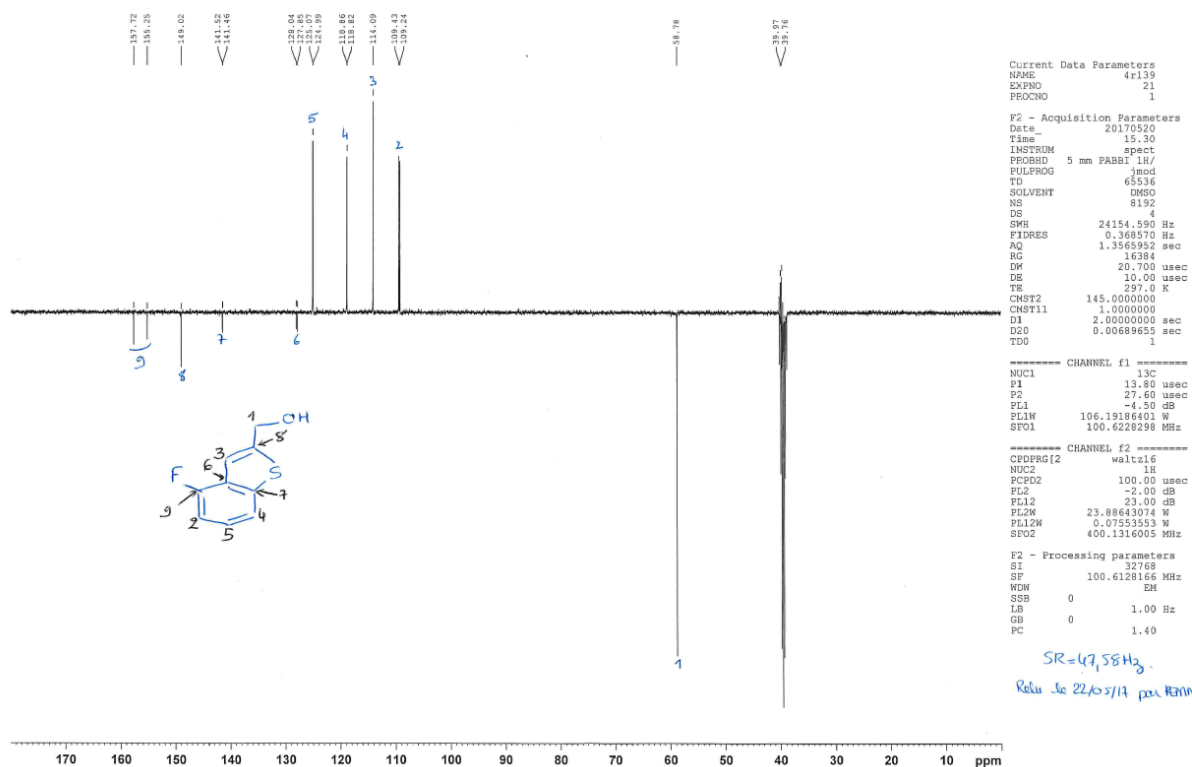

Fig. S4: Recorded JMOD spectra of alcohol 2.

7.2 4-fluorobenzothiophene-2-carbaldehyde 1: match with reported literature data<sup>1</sup>

44819 - 44819AD3 - NA - FLUOROTHIANAL - - 44819A16JFG012 PUR - NA - 1603A01647 -  
10 mg - DMSO - GECT/NJT

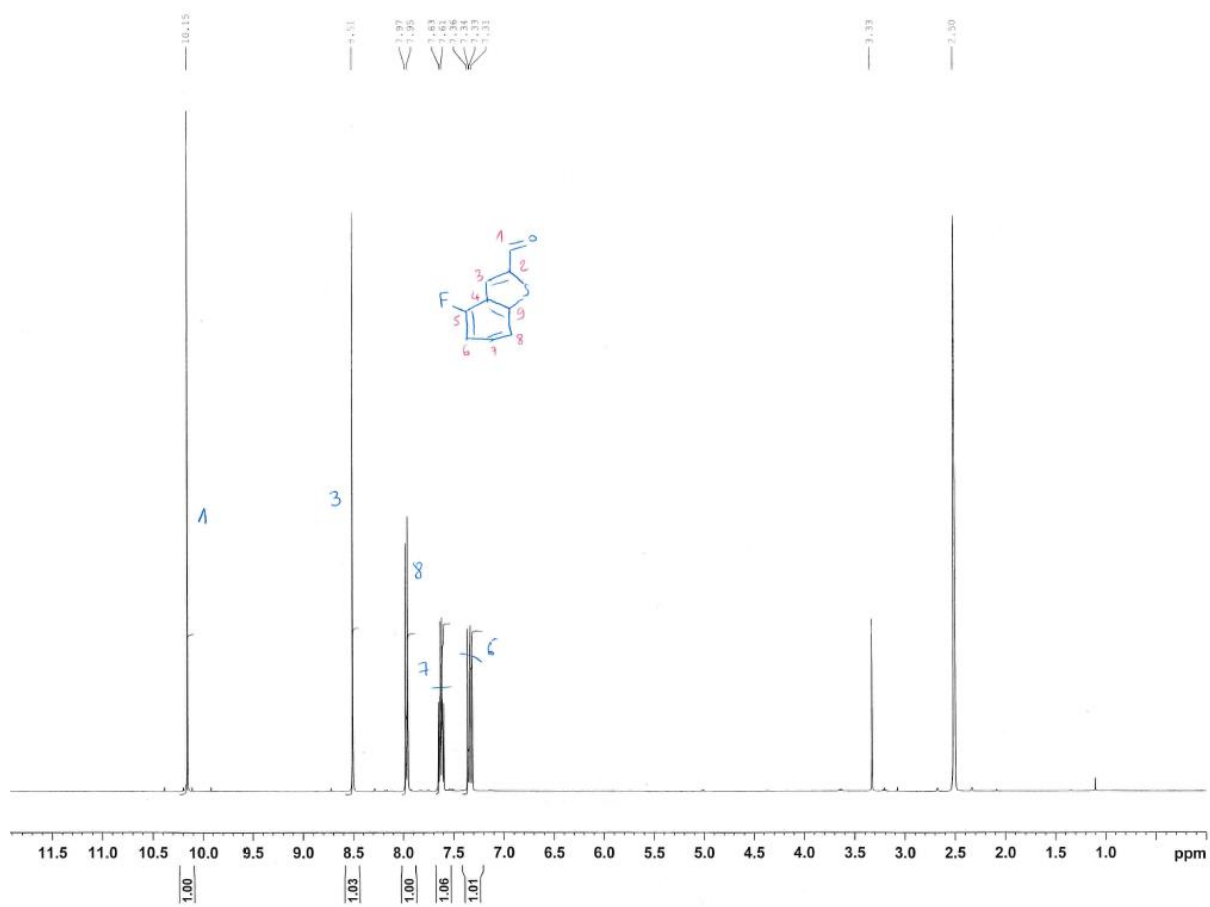

Fig. S5: Recorded <sup>1</sup>H spectra of aldehyde 1.





44819 - NA - NA - FLUOROTHIOLIC - - NEO44819016 APTRAIT - NA - 1705A02093  
12 mg - DMSO - PEMN

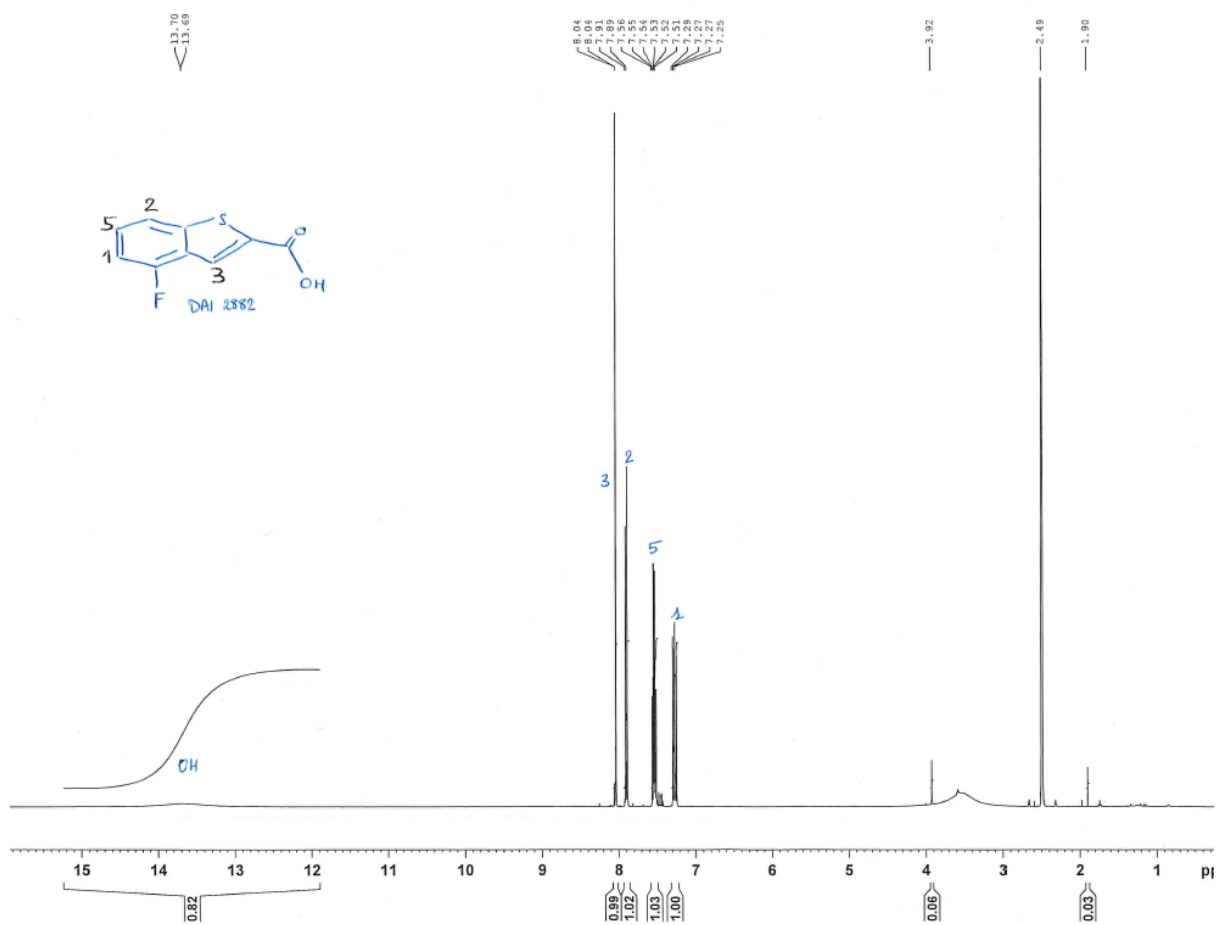

Fig. S7: Recorded  $^1\text{H}$  spectra of overoxidation by-product 3.

44819 - NA - NA - FLUOROTHIOIC - - NEO44819016 APTRAIT - NA - 1705A02093  
12 mg - DMSO - PEMN

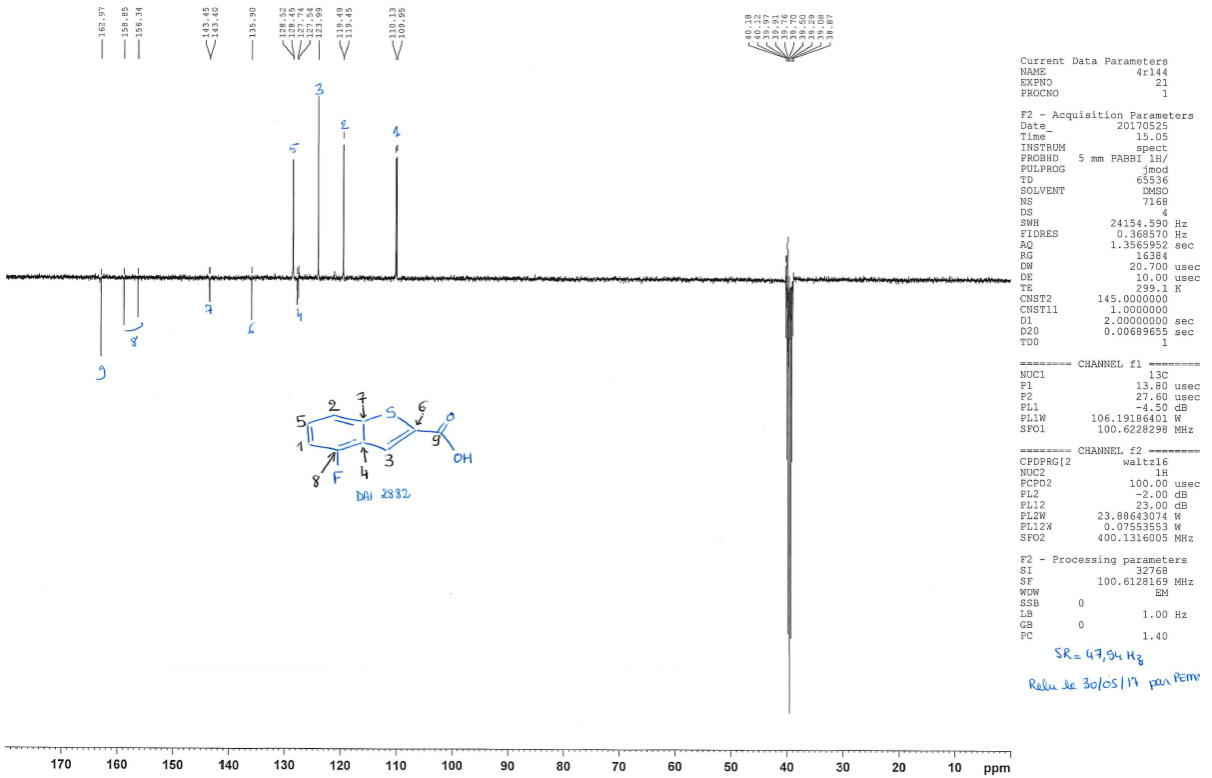

Fig. S8: Recorded JMOD spectra of overoxidation by-product 3.

## 8. Liquid chromatography spectra<sup>3</sup>

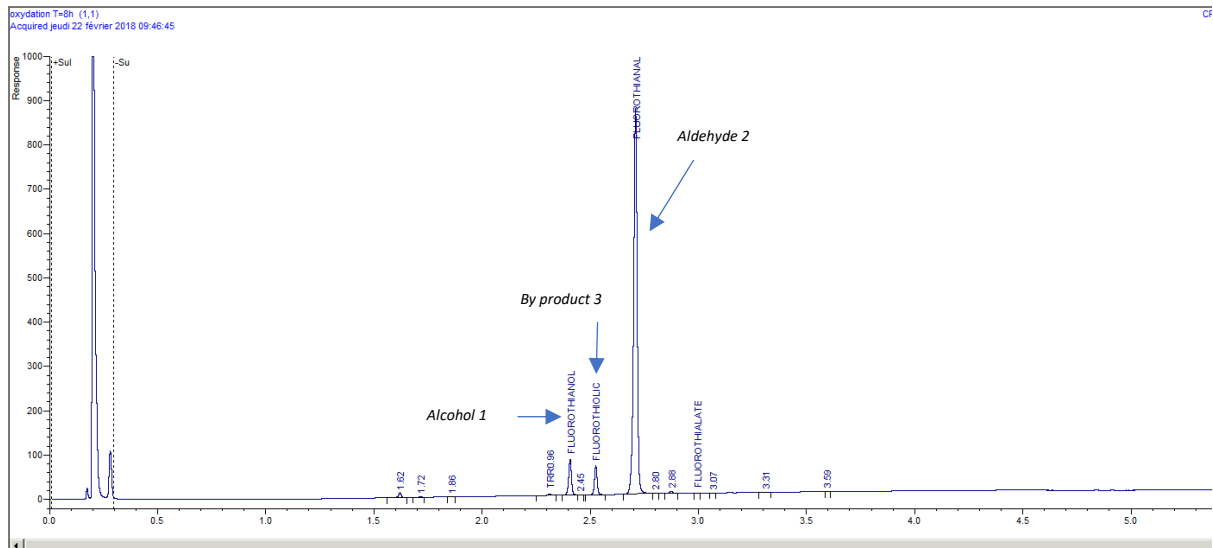

Fig. S9: Typical in Process Control (here after 8 hours) (7 Kg scale). Alcohol 2: 6.44 %; Aldehyde 1: 86.7 %; Carboxylic acid 3: 4.9 %.

<sup>3</sup> Analytical conditions reported in section 1.

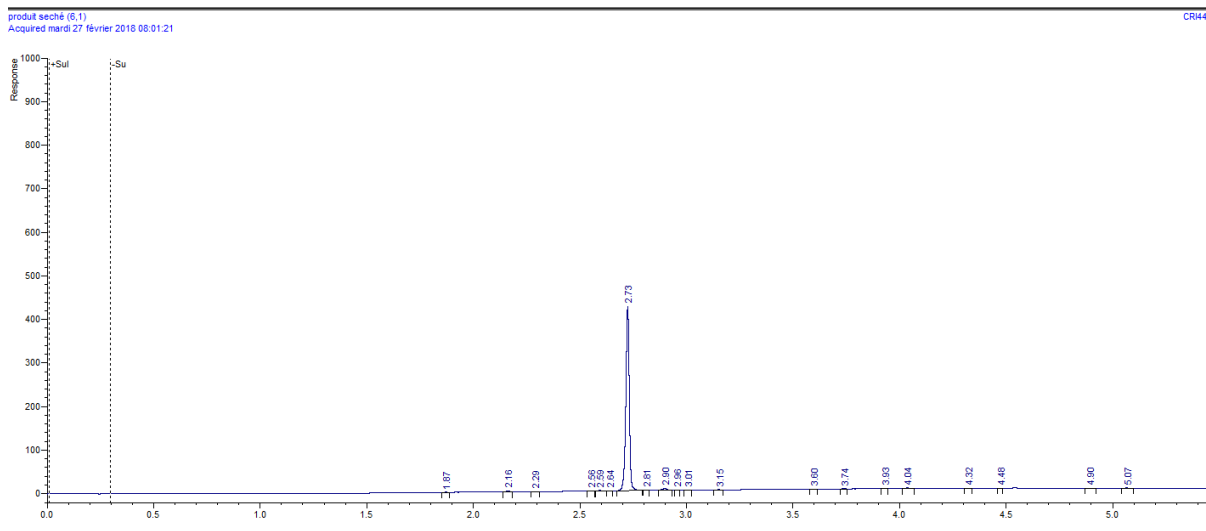

**Fig. S10:** LC spectra of isolated 4-fluorobenzothiophene-2-carbaldehyde **1**, 96.9% purity.

## 9. DSC analysis

### 9.1 Calculation method for TMRad and TD24

Hypothesis: 0 order reaction kinetic.

Adiabatic Time to Maximum Raise is calculated according the following formula:

$$TMR_{ad}(T) = \frac{C_p \times R \times T^2}{E_a \times Q}$$

Where:

$$Q = Q_{ref} \times e^{\left(\frac{-E_a}{R} \left(\frac{1}{T} - \frac{1}{T_{ref}}\right)\right)}$$

→ Q ref and Tref are extracted from the DSC thermogram.

→ EA = activation energy

→ R = gaz constant

→ Cp = heat capacity of the mixture

### 9.2 DSC Spectra

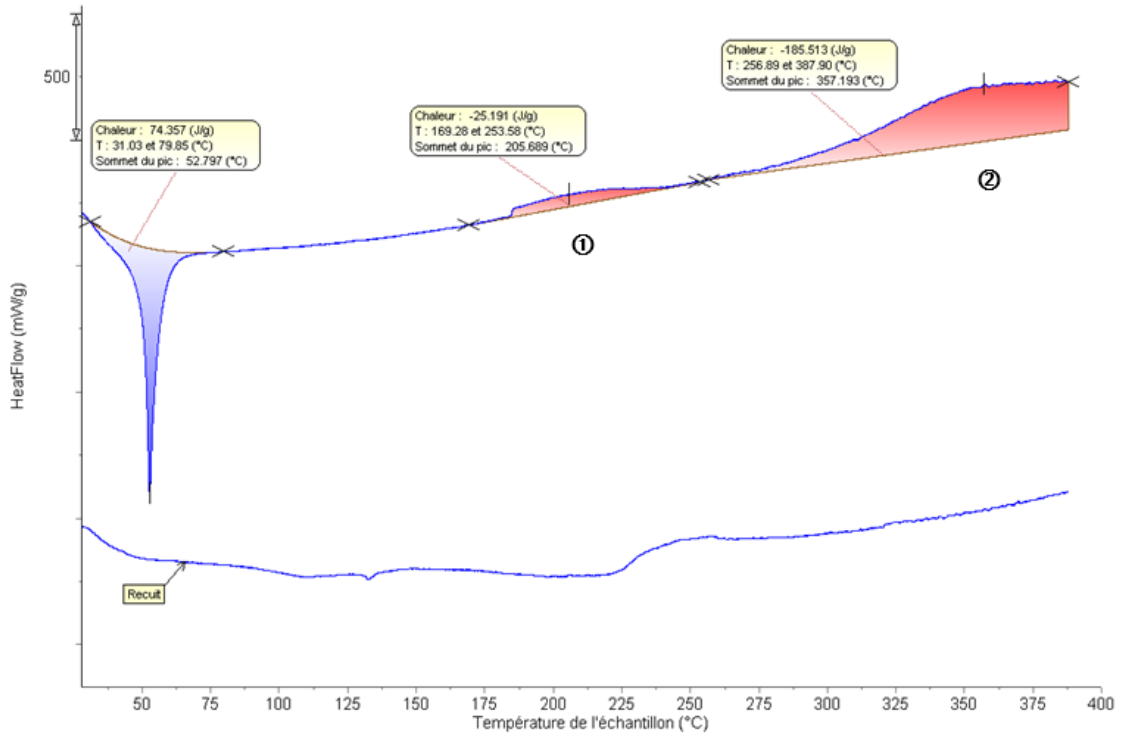

Description des phénomènes exothermiques

|   | T(onset / max / final) [°C] | Enthalpie [J/g] | Commentaires                                                    |
|---|-----------------------------|-----------------|-----------------------------------------------------------------|
| ① | <u>169</u> / 206 / 254      | (-) 25.2        | Energie faible ( $\Delta T_{ad} \approx 25.2^\circ\text{C}$ )   |
| ② | <u>257</u> / 357 / 388      | (-) > 185.5     | Energie modérée ( $\Delta T_{ad} \approx 185.5^\circ\text{C}$ ) |

Fig. S11: DSC of alcohol 2; The  $\Delta T_{ad}$  was calculated with a value of  $C_p = 1.00 \text{ kJ} \cdot \text{kg}^{-1} \cdot \text{K}^{-1}$ .

### Annex 8 Thermal stability of organic phase in DMSO

Sample name: NEO\_44819\_373

Sample aspect: Solution

N° DSC : DSC823\_085/2017

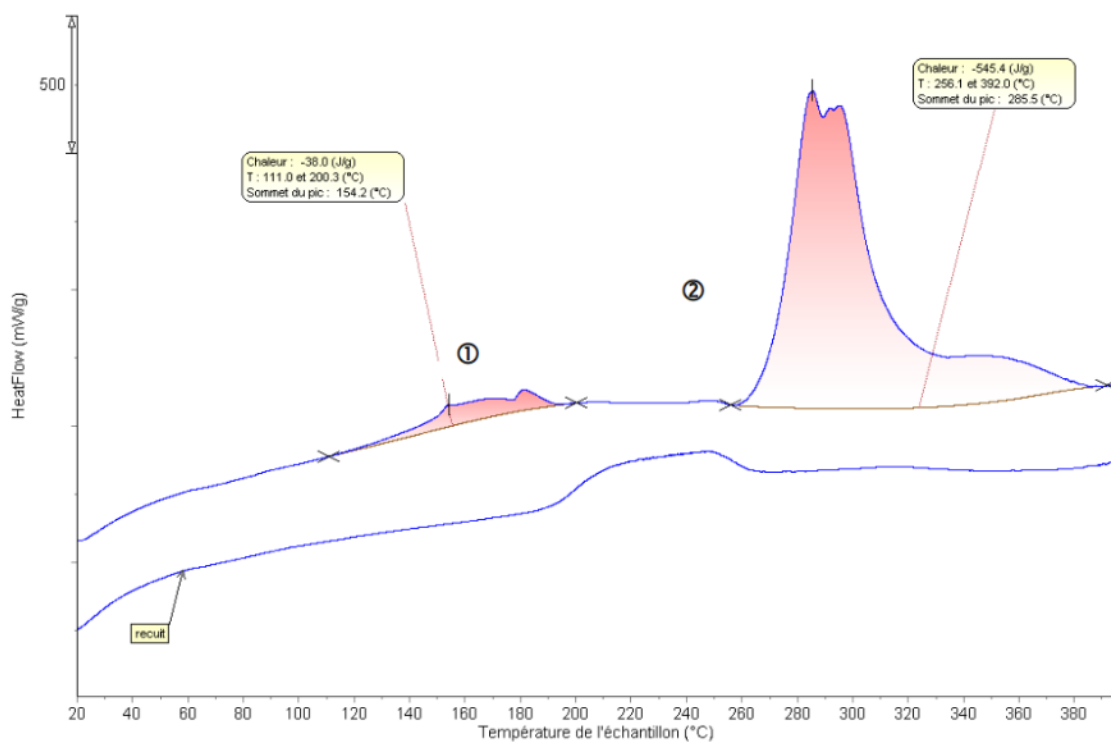

#### Description of exothermic phenomenon

|   | T(onset / max / final) [°C] | Enthalpie [J/g] | Comments                                                    |
|---|-----------------------------|-----------------|-------------------------------------------------------------|
| ① | 111 / 154 / 200             | (-) 38          | Energie faible ( $\Delta T_{ad} \approx 19^\circ\text{C}$ ) |
| ② | 256 / 285 / 392             | (-) 545         | Energie forte ( $\Delta T_{ad} \approx 278^\circ\text{C}$ ) |

#### Evaluation of $TMR_{ad}$

Quick TMR

AKTS

| 8h   | 12h  | 24h  | 47 h                      | Ea [kJ/mol] | Cp [kJ/kg.K] | T <sub>ref</sub> [°C] | q <sub>ref</sub> [W/kg] |
|------|------|------|---------------------------|-------------|--------------|-----------------------|-------------------------|
| 85°C | 79°C | 68°C | T <sub>procédé</sub> 58°C | 70          | 1.96         | 137                   | 21                      |

Fig. S12: Solution of alcohol 2 in DMSO; The  $\Delta T_{ad}$  was calculated with a value of  $C_p = 1.96 \text{ kJ.Kg}^{-1}.\text{K}^{-1}$ .

### Annex 9 Thermal stability at the end of TEMPO/CuCl addition

Sample name: NEO\_44819\_373

Sample aspect: solution

N° DSC : DSC823\_086/2017

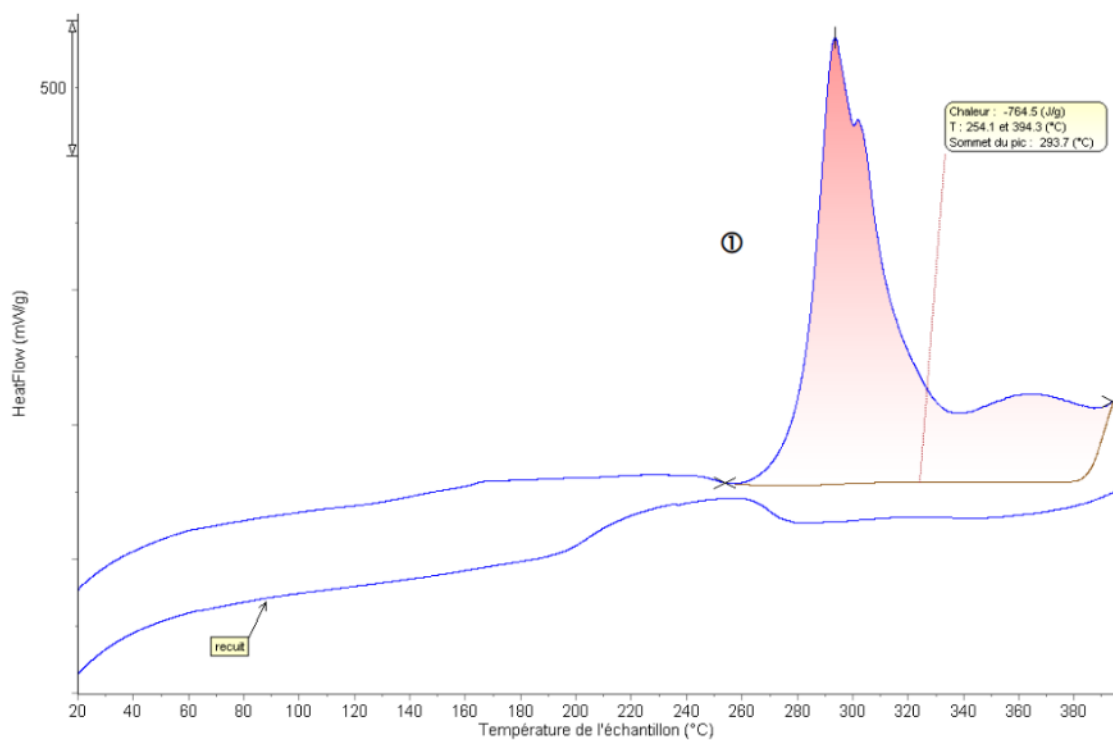

#### Description of exothermic phenomenon

|   | T(onset / max / final) [°C] | Enthalpie [J/g] | Comments                                                      |
|---|-----------------------------|-----------------|---------------------------------------------------------------|
| ① | 254 / 294 / 394             | (-) 764         | Energie forte ( $\Delta T_{ad}^9 \approx 380^\circ\text{C}$ ) |

Fig. S13: DSC of reaction mixture before introduction of air; The  $\Delta T_{ad}$  was calculated with a value of  $C_p = 1.96 \text{ KJ.Kg}^{-1}.\text{K}^{-1}$ .

## Annex 10 Thermal stability at the end of reaction

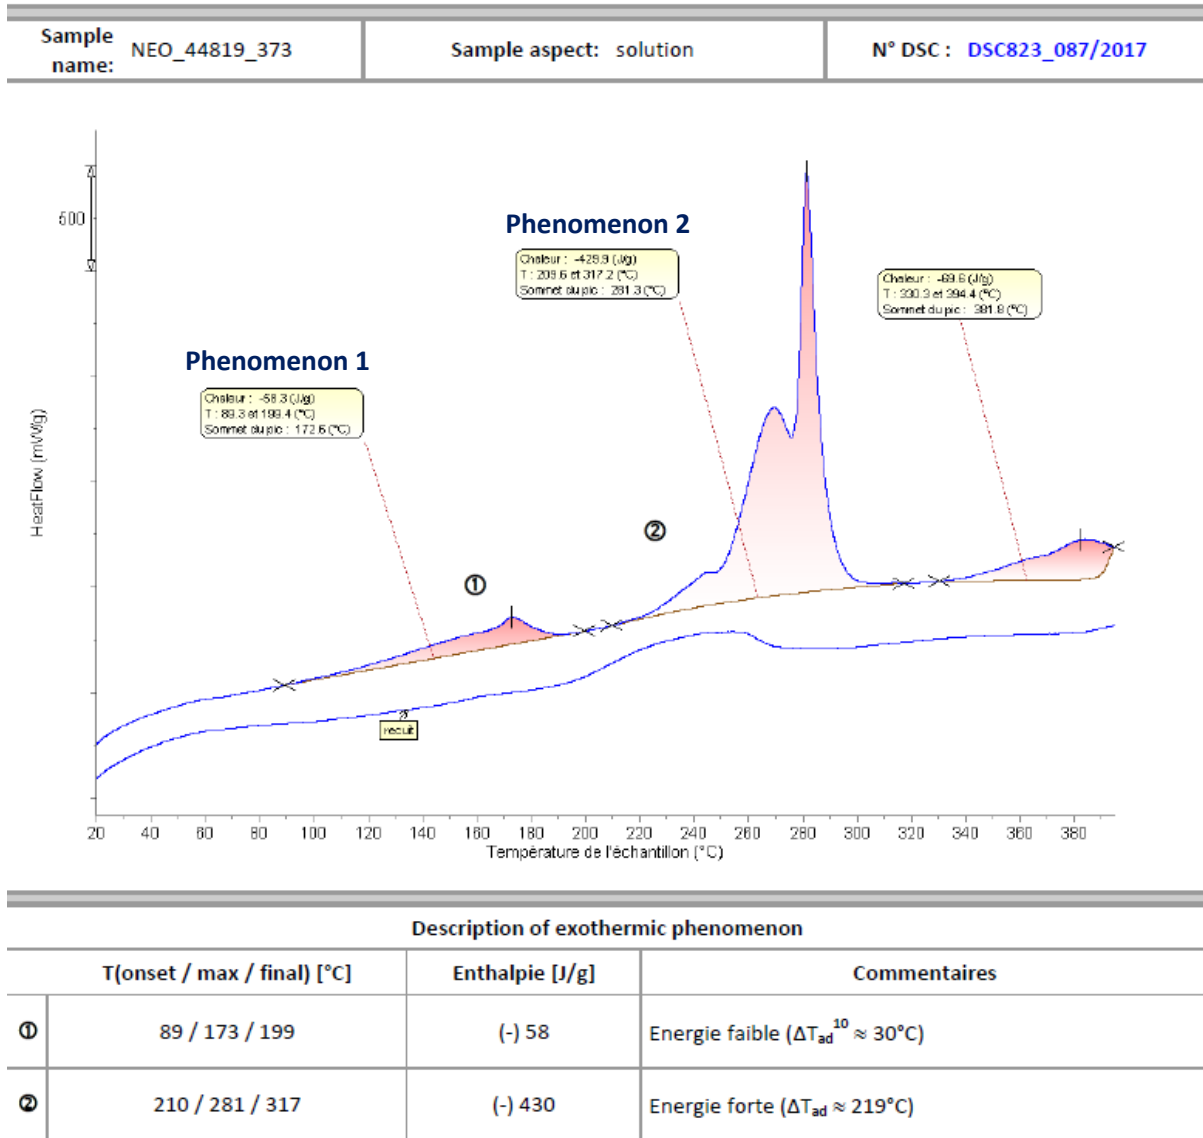

Fig. S14: DSC of reaction mixture at the end of reaction. The  $\Delta T_{ad}$  was calculated with a value of  $C_p = 1.96 \text{ kJ}\cdot\text{kg}^{-1}\cdot\text{K}^{-1}$ .

### Evaluation of TMRad of phenomenon 1 (from DSC in fig.S14):

- With an EA of  $50 \text{ kJmol}^{-1}$

| Estimation du TMRad |        |        |           |        | Ea [kJ/mol] | Cp [kJ/kg.K] | Tref [°C] | Qref [W/kg] |
|---------------------|--------|--------|-----------|--------|-------------|--------------|-----------|-------------|
| 8h                  | 12h    | 24h    | 63h       | 3jours |             |              |           |             |
| 57,5°C              | 49,5°C | 36,5°C | Tp = 20°C |        | 50          | 1,957        | 117,8     | 21,1        |

| Estimation du TMRad |        |        |            |        | Ea [kJ/mol] | Cp [kJ/kg.K] | Tref [°C] | Qref [W/kg] |
|---------------------|--------|--------|------------|--------|-------------|--------------|-----------|-------------|
| 8h                  | 12h    | 24h    | 1h         | 0jours |             |              |           |             |
| 57,5°C              | 49,5°C | 36,5°C | Tp = 119°C |        | 50          | 1,957        | 117,8     | 21,1        |

- With an EA of  $70 \text{ kJmol}^{-1}$



| Estimation du TMRad |        |        |           |         | Ea       | Cp        | Tref  | Qref   |
|---------------------|--------|--------|-----------|---------|----------|-----------|-------|--------|
| 8h                  | 12h    | 24h    | 350h      | 15jours | [kJ/mol] | [kJ/kg.K] | [°C]  | [W/kg] |
| 69,0°C              | 63,0°C | 53,0°C | Tp = 20°C |         | 70       | 1,957     | 117,8 | 21,1   |

| Estimation du TMRad |        |        |            |        | Ea       | Cp        | Tref  | Qref   |
|---------------------|--------|--------|------------|--------|----------|-----------|-------|--------|
| 8h                  | 12h    | 24h    | 0h         | 0jours | [kJ/mol] | [kJ/kg.K] | [°C]  | [W/kg] |
| 69,0°C              | 63,0°C | 53,0°C | Tp = 119°C |        | 70       | 1,957     | 117,8 | 21,1   |

### Evaluation of TMRad of phenomenon 2 (from DSC in fig. S14):

- With an EA of 50 KJmol<sup>-1</sup>

| Estimation du TMRad |         |         |            |        | Ea       | Cp        | Tref  | Qref   |
|---------------------|---------|---------|------------|--------|----------|-----------|-------|--------|
| 8h                  | 12h     | 24h     | 15h        | 1jours | [kJ/mol] | [kJ/kg.K] | [°C]  | [W/kg] |
| 138,5°C             | 125,5°C | 105,5°C | Tp = 119°C |        | 50       | 1,957     | 225,4 | 25,0   |

| Estimation du TMRad |         |         |            |        | Ea       | Cp        | Tref  | Qref   |
|---------------------|---------|---------|------------|--------|----------|-----------|-------|--------|
| 8h                  | 12h     | 24h     | 6h         | 0jours | [kJ/mol] | [kJ/kg.K] | [°C]  | [W/kg] |
| 138,5°C             | 125,5°C | 105,5°C | Tp = 149°C |        | 50       | 1,957     | 225,4 | 25,0   |

- With an EA of 70 KJmol<sup>-1</sup>

| Estimation du TMRad |         |         |            |        | Ea       | Cp        | Tref  | Qref   |
|---------------------|---------|---------|------------|--------|----------|-----------|-------|--------|
| 8h                  | 12h     | 24h     | 39h        | 2jours | [kJ/mol] | [kJ/kg.K] | [°C]  | [W/kg] |
| 154,5°C             | 144,5°C | 129,5°C | Tp = 119°C |        | 70       | 1,957     | 225,4 | 25,0   |

| Estimation du TMRad |         |         |            |        | Ea       | Cp        | Tref  | Qref   |
|---------------------|---------|---------|------------|--------|----------|-----------|-------|--------|
| 8h                  | 12h     | 24h     | 10h        | 0jours | [kJ/mol] | [kJ/kg.K] | [°C]  | [W/kg] |
| 154,5°C             | 144,5°C | 129,5°C | Tp = 149°C |        | 70       | 1,957     | 225,4 | 25,0   |

## 10. Calorimetric study

### 10.1 Apparatus

Experiment was recorded using METTLER-TOLEDO EasyMax 102 heat flow calorimeter on 15 gr scale.

| EasyMax 102 | Description                                            |
|-------------|--------------------------------------------------------|
| Device      | EasyMax 102 (Serial #: B308064965 / Firmware: 5.2.2.0) |
| Reactor     | 100 ml                                                 |
| Stirrer     | Overhead                                               |

|             |                                                                        |
|-------------|------------------------------------------------------------------------|
| EasyMax 102 | Description                                                            |
| Other       | Tr Sensor<br>HFCal (last adjusted on 07/03/2023)<br>Calibration Heater |

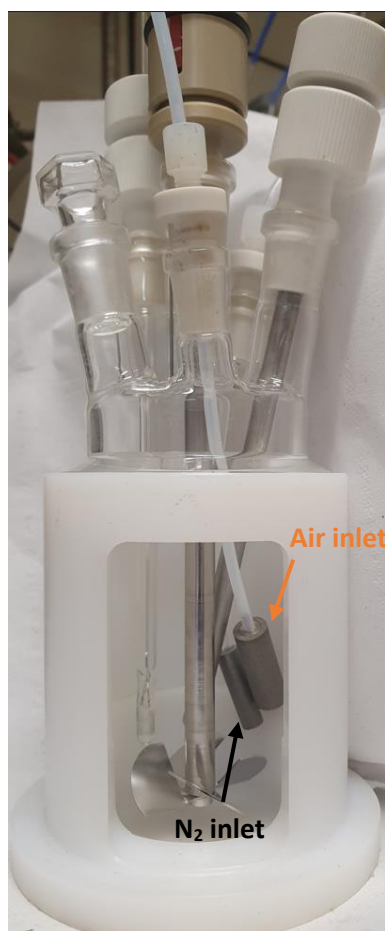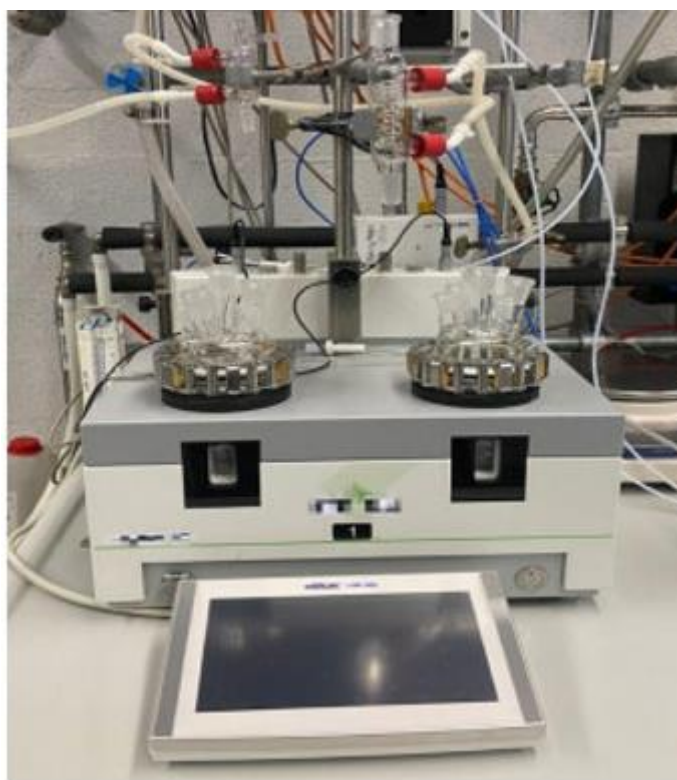

NB: This experiment was repeated 3 times with reproducible results.

## 10.2 EasyMax report

### 10.2.1 Calorimetric experiment

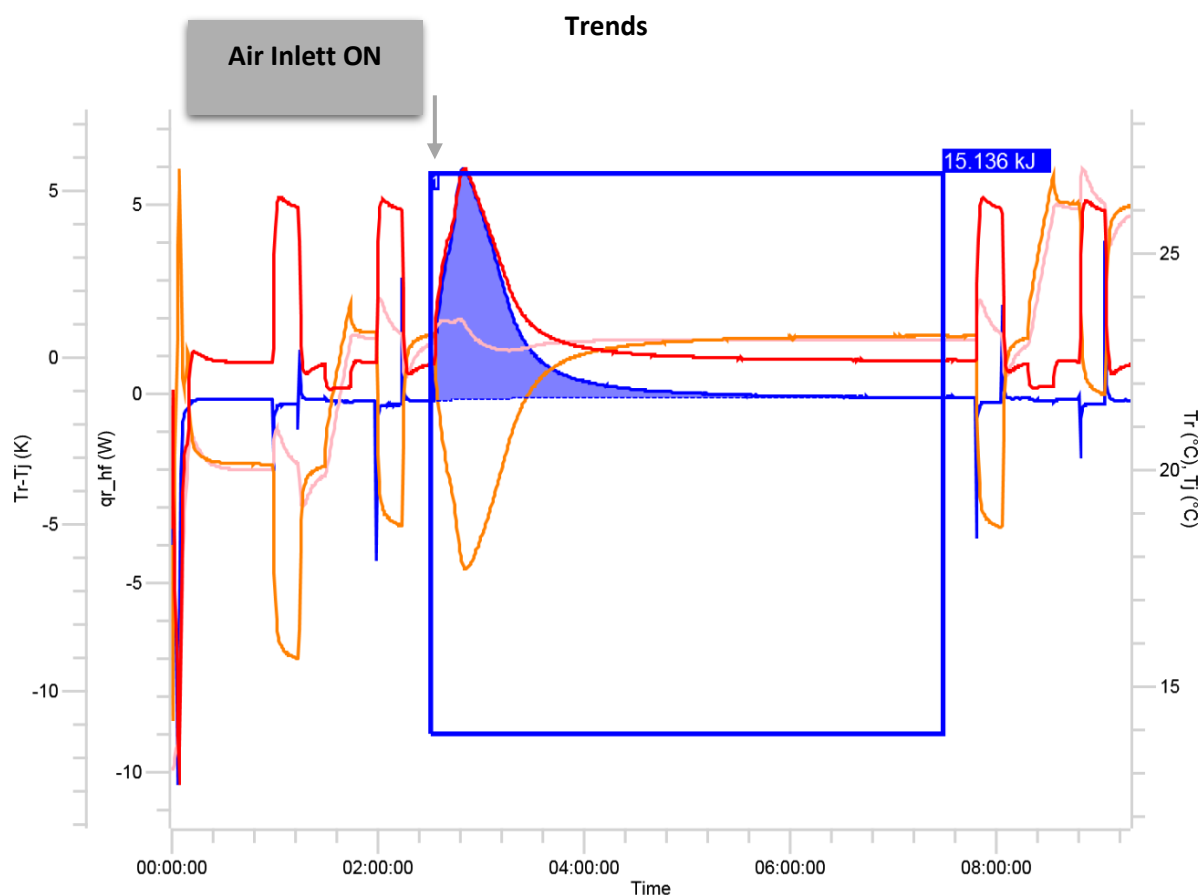

### Integral Results

| Trend | Name | Start Time | End Time | Integral  | Baseline Type              | $\Delta T_{ad}$ |
|-------|------|------------|----------|-----------|----------------------------|-----------------|
| qr_hf | 1    | 02:30:32   | 07:28:46 | 15.136 kJ | Proportional To Conversion | 98.783 K        |

### Virtual Volume (Vv)

| Time     | Vv (used) | Interpolation      |
|----------|-----------|--------------------|
| 00:00:06 | 89.06 ml  | Proportional to Vr |
| 00:44:08 | 90 ml     | Constant offset    |

### Heat Transfer Coefficient (U)

| Time     | U (used)                  | Calculated by   | Interpolation               |
|----------|---------------------------|-----------------|-----------------------------|
| 01:06:40 | 125.56 W/K*m <sup>2</sup> | Standard method | Proportional to Vv_observed |
| 02:06:44 | 127.31 W/K*m <sup>2</sup> | Standard method | Proportional to Vv_observed |
| 07:55:28 | 127.46 W/K*m <sup>2</sup> | Standard method | Proportional to Vv_observed |
| 08:55:32 | 128.55 W/K*m <sup>2</sup> | Standard method | Hold value                  |

### Specific Heat (cpr)

| Time     | cpr (used)   | Calculated by   | Interpolation      |
|----------|--------------|-----------------|--------------------|
| 01:36:40 | 1.6002 J/g*K | Standard method | Proportional to Mr |
| 08:25:28 | 1.5870 J/g*K | Standard method | Hold value         |

## Various Parameters

|                             |                                           |
|-----------------------------|-------------------------------------------|
| qr definition               | $qr\_hf = qflow\_hf - qc + qaccu + qdos$  |
| qdos averaged               | yes                                       |
| cpi at 50 ml                | 7.1 J/K                                   |
| cpi at 100 ml               | 16.79 J/K                                 |
| Reactor Time Constant       | 15 s                                      |
| $\Delta T_{ad}$ calculation | Use mr and cpr at the end of the integral |

### 10.2.2 Air supply impact evaluation

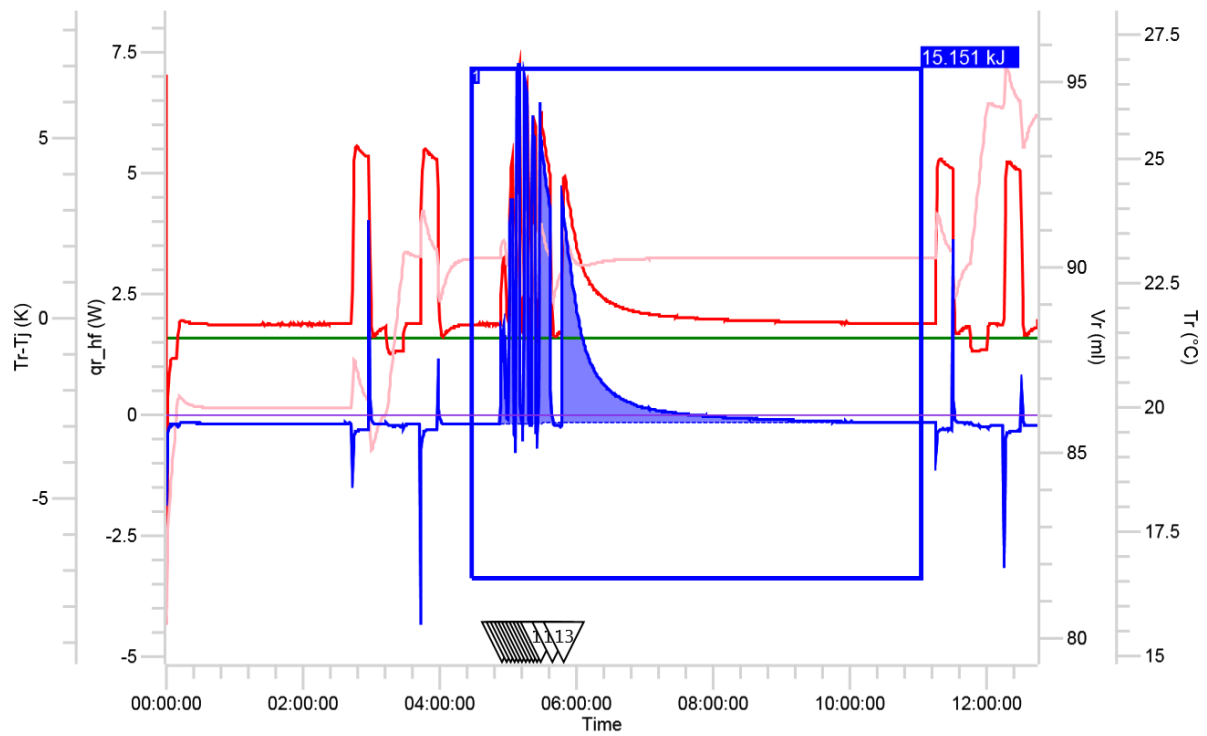

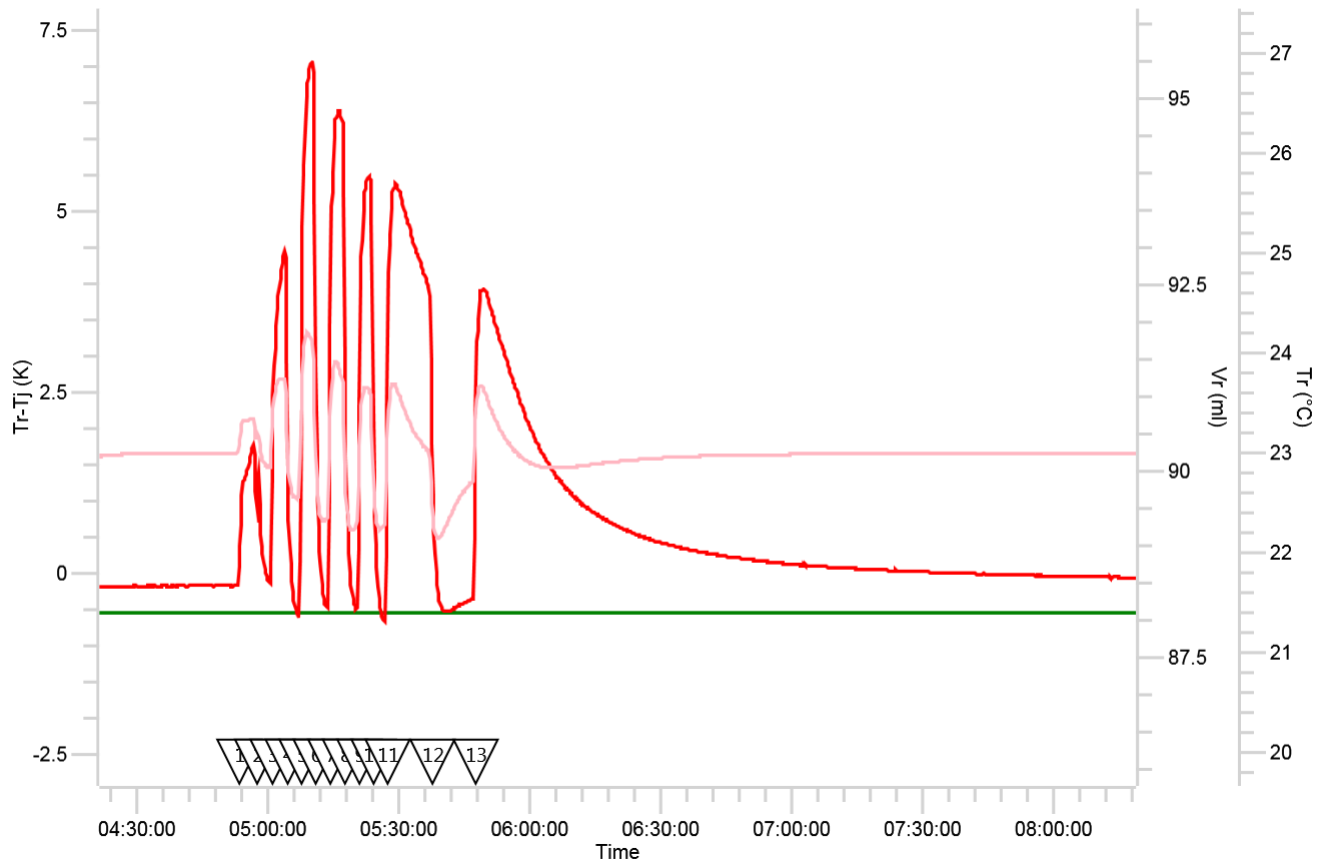

| Trend | Color | Units |
|-------|-------|-------|
| Tr    |       | °C    |
| Vr    |       | ml    |
| Tr-Tj |       | K     |

| #  | Action / Annotation |
|----|---------------------|
| 1  | AD CATA AIR         |
| 2  | NITROGENE           |
| 3  | AIR                 |
| 4  | NITROGENE           |
| 5  | AIR                 |
| 6  | NITROGENE           |
| 7  | AIR                 |
| 8  | NITROGENE           |
| 9  | AIR                 |
| 10 | NITROGENE           |
| 11 | AIR                 |
| 12 | NITROGENE           |

| #       | Action / Annotation |
|---------|---------------------|
| 13<br>v | AIR                 |

### Integral Results

| Trend | Name | Start Time | End Time | Integral  | Baseline Type              | $\Delta T_{ad}$ |
|-------|------|------------|----------|-----------|----------------------------|-----------------|
| qr_hf | 1    | 04:45:28   | 10:56:28 | 15.304 kJ | Proportional To Conversion | 96.634 K        |

### Virtual Volume (Vv)

| Time     | Vv (used) | Interpolation      |
|----------|-----------|--------------------|
| 00:00:06 | 88.12 ml  | Proportional to Vr |
| 02:28:20 | 90 ml     | Constant offset    |

### Heat Transfer Coefficient (U)

| Time     | U (used)                  | Calculated by   | Interpolation               |
|----------|---------------------------|-----------------|-----------------------------|
| 02:50:52 | 125.76 W/K*m <sup>2</sup> | Standard method | Proportional to Vv_observed |
| 03:50:56 | 127.48 W/K*m <sup>2</sup> | Standard method | Proportional to Vv_observed |
| 11:22:04 | 135.05 W/K*m <sup>2</sup> | Standard method | Proportional to Vv_observed |
| 12:22:08 | 136.52 W/K*m <sup>2</sup> | Standard method | Hold value                  |

### Specific Heat (cpr)

| Time     | cpr (used)   | Calculated by   | Interpolation      |
|----------|--------------|-----------------|--------------------|
| 03:20:52 | 1.6248 J/g*K | Standard method | Proportional to Mr |
| 11:52:08 | 1.6625 J/g*K | Standard method | Hold value         |

### Various Parameters

|                             |                                           |
|-----------------------------|-------------------------------------------|
| qr definition               | $qr\_hf = qflow\_hf - qc + qaccu + qdos$  |
| qdos averaged               | yes                                       |
| cpi at 50 ml                | 7.1 J/K                                   |
| cpi at 100 ml               | 16.79 J/K                                 |
| Reactor Time Constant       | 15 s                                      |
| $\Delta T_{ad}$ calculation | Use mr and cpr at the end of the integral |

## 11. Green metrics calculation

### 11.1 DDQ process

| Materials                       | Input (Kg) | Output (Kg) | Hazardous        |
|---------------------------------|------------|-------------|------------------|
| Alcohol 2                       | 12.5       |             | Yes <sup>a</sup> |
| CH <sub>2</sub> Cl <sub>2</sub> | 120        |             | yes              |
| DDQ                             | 16         |             | yes              |
| CH <sub>2</sub> Cl <sub>2</sub> | 160        |             | yes              |
| Aq NaHCO <sub>3</sub>           | 137.5      |             |                  |
| Aq NaHCO <sub>3</sub>           | 137.5      |             |                  |
| Aq NaHCO <sub>3</sub>           | 137.5      |             |                  |
| Aq NaHCO <sub>3</sub>           | 137.5      |             |                  |
| water                           | 80         |             |                  |

|                   |        |    |  |
|-------------------|--------|----|--|
| water             | 80     |    |  |
| water             | 150    |    |  |
| water             | 100    |    |  |
| di-isopropylether | 36     |    |  |
| Aldehyde 1        |        | 10 |  |
| total             | 1304.5 | 10 |  |

**Table S11:** Materials charges used for the DDQ process; a. In order to compare DDQ and Cu/air process, and in absence of any data, alcohol 1 is considered as non-hazardous material.

$$\text{PMI} = \frac{\Sigma m (\text{Input materials incl water})}{m (\text{Product})} = \frac{1304.5}{10} = \mathbf{130 \text{ Kg/Kg of 1}}$$

$$\text{RME} = \frac{m \text{ Product} * 100}{\Sigma m (\text{Raw materials})} = \frac{10 * 100}{12.5 + 16} = \mathbf{35\%}$$

$$\text{EMY} = \frac{m \text{ Product} * 100}{\Sigma m (\text{Hazardous reactants/reagents})} = \frac{10}{16} = \mathbf{63\%}$$

$$\text{Reagents cost}^a = \frac{\Sigma (\text{reagent's price})}{m \text{ Product}} = \frac{16 * 1510.4}{10} = \mathbf{2416 \text{ euros/Kg 1}}$$

**Fig. S15:** selected metrics calculation for DDQ oxidation process; a. Price (from ABCR) of = 1510.4 euros/Kg.

## 11.2 Aerobic copper oxidation process

| Material <sup>a</sup> | Input (Kg) | Output (Kg) | Hazardous        |
|-----------------------|------------|-------------|------------------|
| Alcohol 2             | 19.51      |             | yes <sup>b</sup> |
| CuCl                  | 2.107      |             | yes <sup>c</sup> |
| TEMPO                 | 0.176      |             | yes <sup>d</sup> |
| DMSO                  | 107.3      |             |                  |
| WATER                 | 196        |             |                  |
| AMMONIA (11 N)        | 17.4       |             |                  |
| water                 | 90         |             |                  |
| water                 | 90         |             |                  |
| HCl 1N                | 95.6       |             |                  |
| HCl 1N                | 95.6       |             |                  |
| HCl 1N                | 95.6       |             |                  |
| Aldehyde 1            |            | 13.3        |                  |
| total                 | 809.3      | 13.3        |                  |

**Table S12:** Materials charges used for the Cu/Tempo/Air process; a. Charge of Input material is an average of the 3 batches of the campaign; b. In order to compare DDQ and Cu/air process, and in absence of any data, alcohol 2 is considered as non-hazardous material. c. CuCl is considered as hazardous for environment; d. TEMPO is considered as hazardous material.

$$\text{PMI} = \frac{\Sigma m (\text{Input materials incl water})}{m (\text{Product})} = \frac{809.3}{13.3} = \mathbf{60.8 \text{ Kg/Kg of 1}}$$

$$\text{RME} = \frac{m \text{ Product} * 100}{\Sigma m (\text{Raw materials})} = \frac{13.3}{19.51} = \mathbf{68\%}$$

$$\text{EMY} = \frac{m \text{ Product} * 100}{\Sigma m (\text{Hazardous reactants/reagents})} = \frac{13.3}{2.107 + 0.176} = \mathbf{583\%}$$

$$\text{Reagents cost}^a = \frac{\Sigma (\text{reagent's price})}{m \text{ Product}} = \frac{(2.107 * 94.5) + (1076.8 * 0.176)}{13.3} = \mathbf{29.2 \text{ euros/Kg 1}}$$

**Fig. S16:** Selected metrics calculation for Cu/TEMPO/air oxidation process; a. Price (from ABCR): CuCl = 94.5 euros/Kg, TEMPO = 1076.8 euros/Kg.

---

## 12. Scope of the method

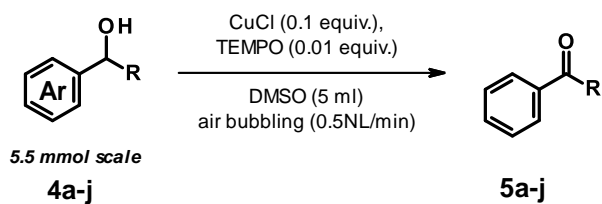

### Standard procedure:

Alcohol **4a-j** (5.5 mmol, 1 equiv.), CuCl (54 mg, 0.55 mmol, 0.1 equiv.), TEMPO (8.6 mg, 0.55 mmol, 0.01 equiv.) and DMSO (5 mL) were charged in 10 mL three necks round bottom flask. Reaction mixture was stirred (magnetic stirring, 1400 rpm) in presence of air (air bubbling through reaction mixture, 0.5NL/min) and at 20°C until maximum of conversion. Reaction mixture was quenched by addition of NH<sub>4</sub>OH solution (10% w.w, 10ml), turning the color from green to deep blue and extracted by MTBE (2\*15 ml). Organic layers were combined, washed by brine (2\*10 ml) and concentrated to dryness to give title compound **4a-j**.



## Benzaldehyde 5a: match with reported data<sup>4</sup>

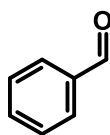

5a

Obtained using standard procedure with 96% content in reaction mixture (determined by LC chromatography, reaction performed from 595 mg of **4a**). Partial decomposition of product was observed during isolation.

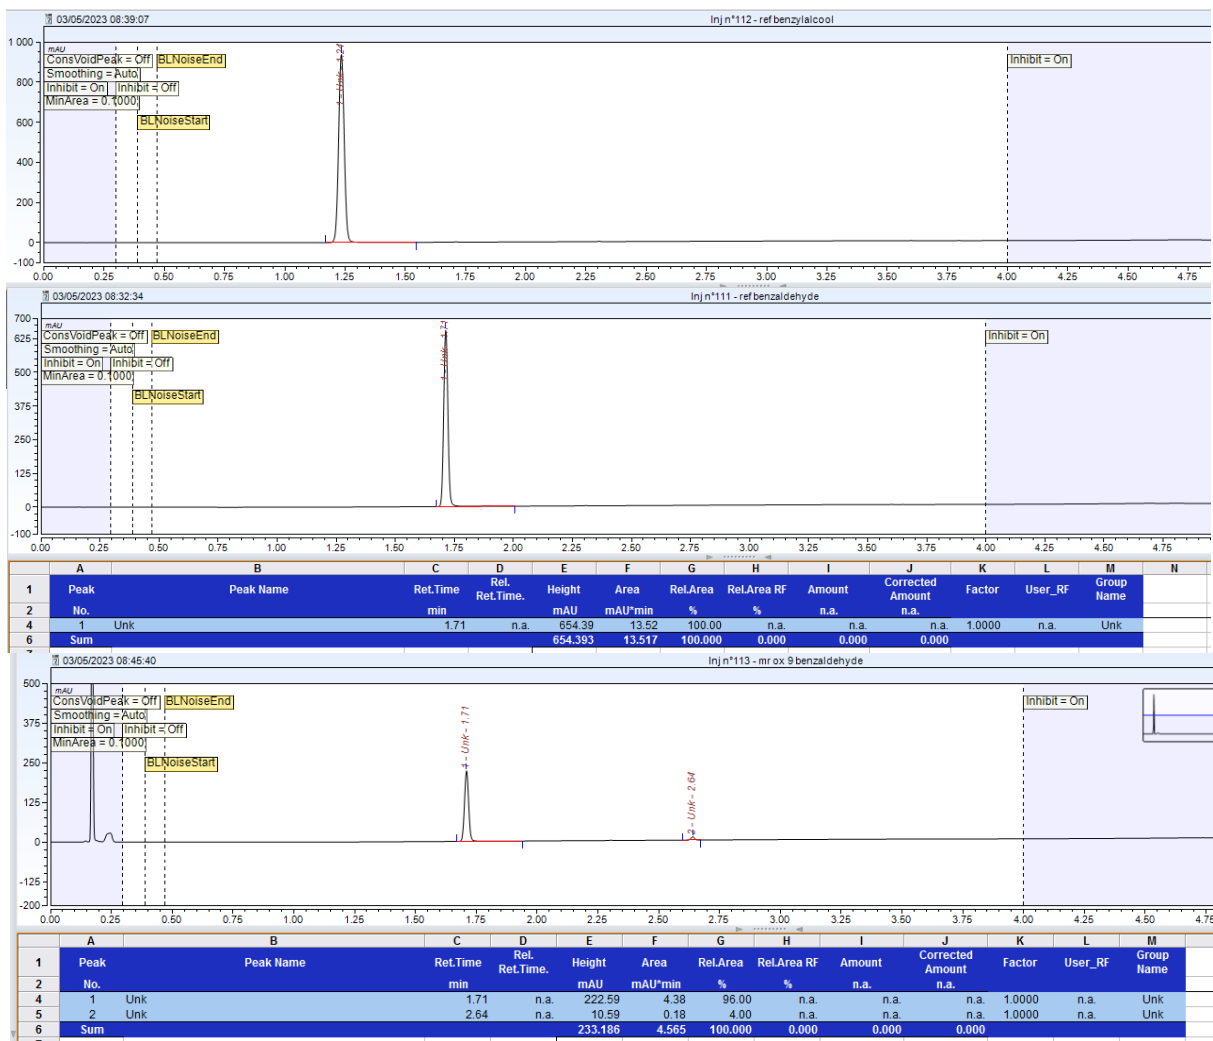

Fig S17. top: LC spectra of **4a**; middle = LC spectra of commercial benzaldehyde; bottom = ICP (In Process Control) at the end of oxidation of **4a**

<sup>4</sup> S. Velusamy and T. Punniyamurthy, *Org. Lett.* 2004, 6, 2, 217.

4-methoxybenzaldehyde **5b**: match with reported data<sup>5</sup>

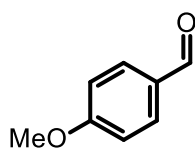

Obtained using standard procedure with 80% yield (600 mg isolated from 760 mg of **4b**) as yellow liquid. No purification was required.

**5b**

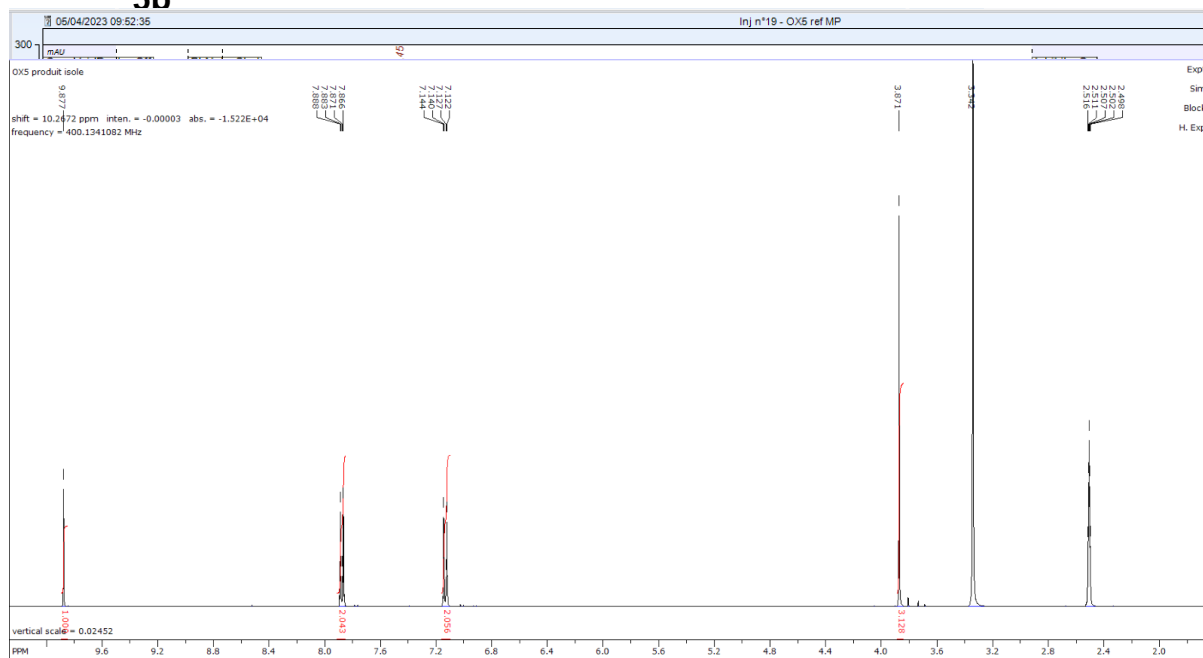

**Fig S18**: At the top = alcohol **4b**; middle: reaction mixture at 100% conversion. bottom. <sup>1</sup>H NMR (d<sub>6</sub>-DMSO) of isolated product **5b**.

2-bromobenzaldehyde **5g**: match with reported data<sup>6</sup>

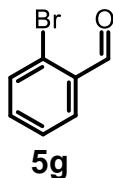

Obtained using standard procedure with 85% yield (850 mg isolated from 1.02 g of **4g**) of alcohol Y as slightly orange liquid. No purification was required.

<sup>5</sup> J. Zhang, J. Du, C. Zhang, K. Liu, F. Yu, Y. Yuan, B. Duan and R. Liu, *Org. Lett.*, 2022, **24**, 1152.

<sup>6</sup> G. Zhang, X. Wen, Y. Wang, X. Han, Y. Luan, L. Zheng, C. Ding, and X. Cao, *RSC Adv.*, 2013, **45**, 22918.

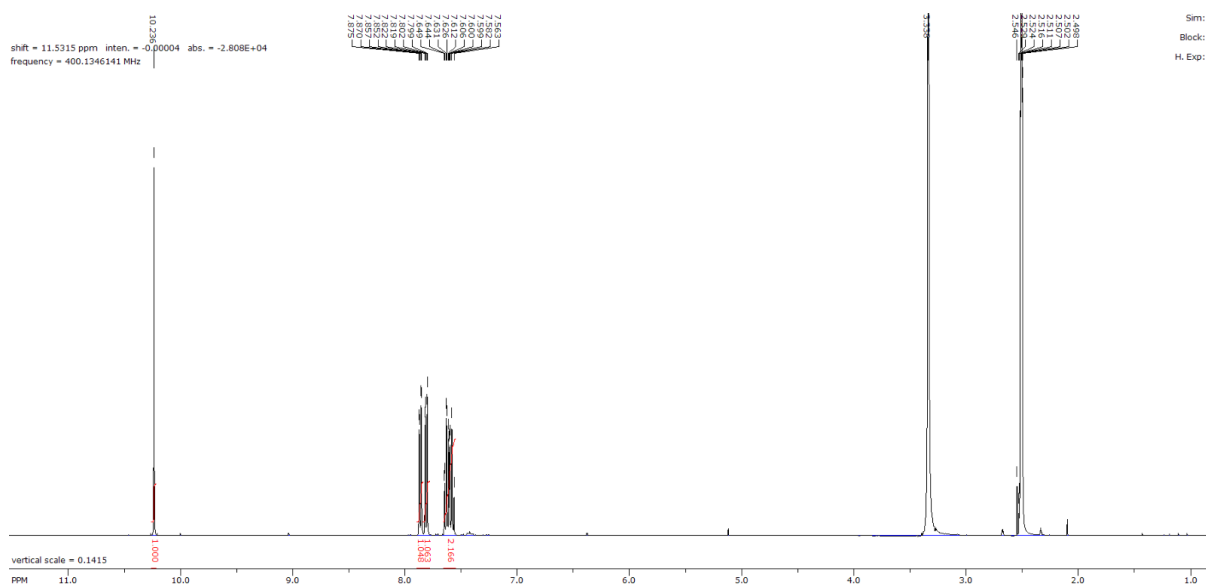

**Fig S19.**  $^1\text{H}$  NMR (d6-DMSO) of isolated product **5g**.

### 3,4-dimethoxybenzaldehyde **5c**: match with reported data<sup>7</sup>

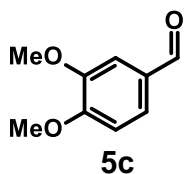

Obtained using standard procedure with 87.5% yield (800 mg isolated from 925 mg of **4c**) as white off solid. No purification was required.

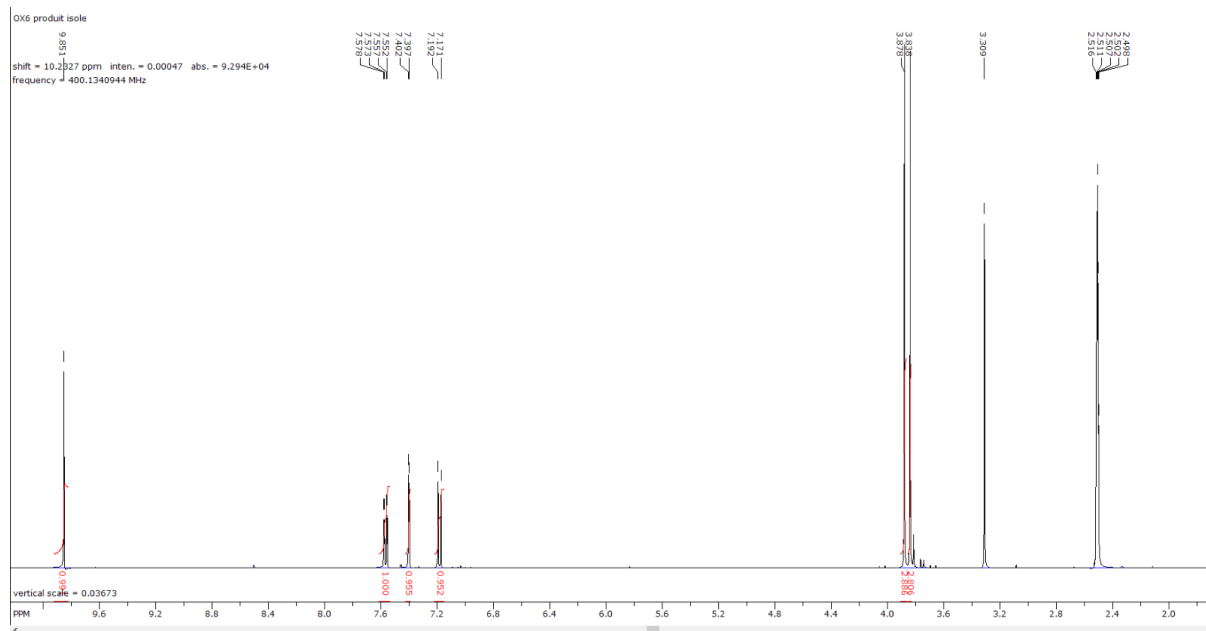

**Fig S20:**  $^1\text{H}$  NMR (d6-DMSO) of isolated product **5c**.

<sup>7</sup> R. Iioka, K. Yorozu, Y. Sakai, R. Kawai, N. Hatae, K. Takashima, G. Tanabe, H. Wasada and M. Yoshimatsu, *Eur. J. Org. Chem.*, 2021, **10**, 1553.

### 2-nitrobenzaldehyde **5e**: match with reported data<sup>7</sup>

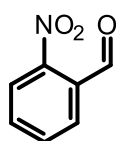

**5e**

Obtained using standard procedure with 73.4% yield (610 mg isolated from 832 mg of alcohol **4e**) as pale-yellow solid. The reaction was monitored by TLC. Purification was performed by flash chromatography on silica with CH<sub>2</sub>Cl<sub>2</sub>/MethylCyclohexane (50/50).

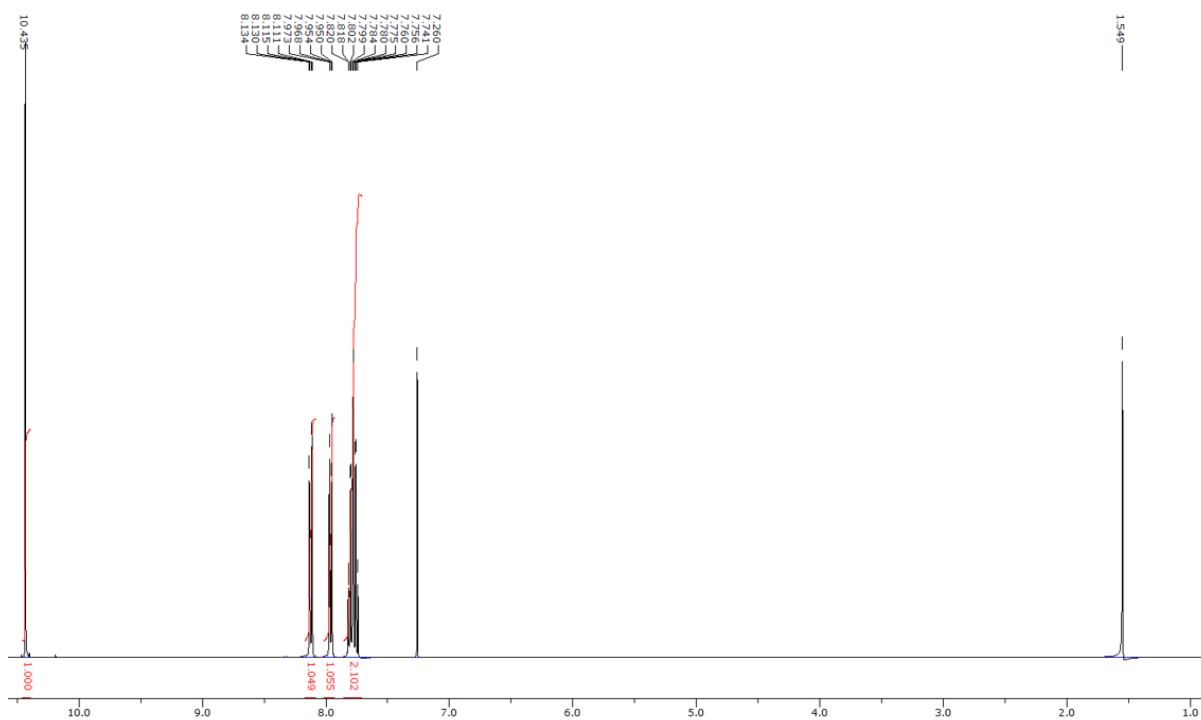

**Fig S21:** <sup>1</sup>H NMR (CDCl<sub>3</sub>) of isolated product **5e**.

### Pyridine-2-carbaldehyde **5g**: match with reported data<sup>8</sup>

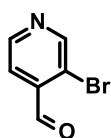

**5g**

Obtained using standard procedure with 50% yield (520 mg isolated from 1.03 gr of alcohol **4g**) as white powder. Reaction was monitoring by TLC (DCM/OAcEt 80/20). Purification was performed by filtration on silica pad with Dichloromethane/OEtAc (80/20).

<sup>8</sup> X. Gao, S. Han, M. Zheng, A. Liang, J. Li, D. Zou, Y. Wu and Y. Wu, *J. Org. Chem.*, 2019, **84**, 4040.

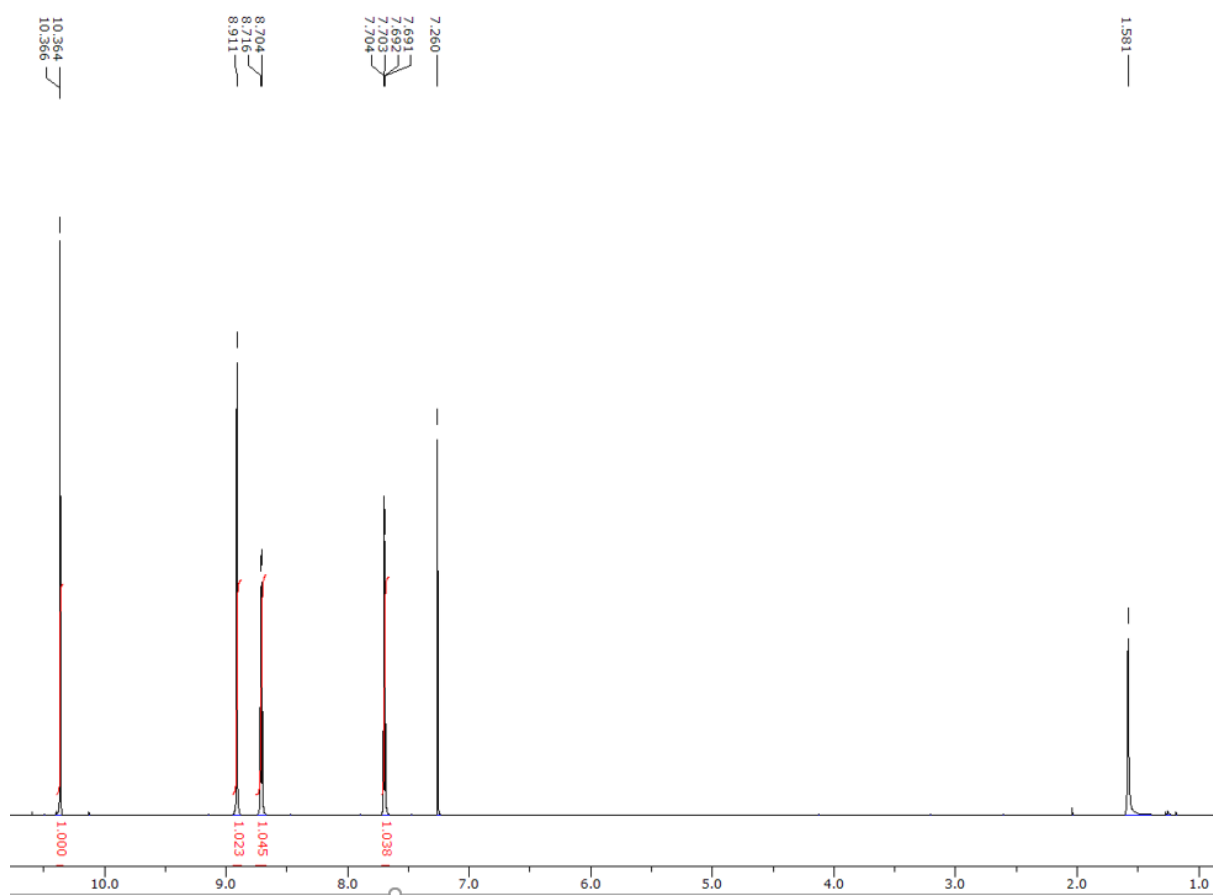

**Fig S22:**  $^1\text{H}$  NMR ( $\text{CDCl}_3$ ) of isolated product **5g**.

**2-Fluoro-3-nitrobenzaldehyde **5f**:** match with reported data<sup>9</sup>

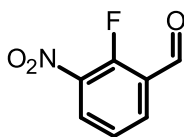

Obtained using standard procedure with 59% yield (550 mg isolated from 932 mg of alcohol **4f**) as yellow oil. The reaction was monitoring by TLC (DCM). Purification was performed by flash chromatography with Dichloromethane/MethylCycloHexane (70/30).

<sup>9</sup> Spectral data were obtained from Enamine Ltd.

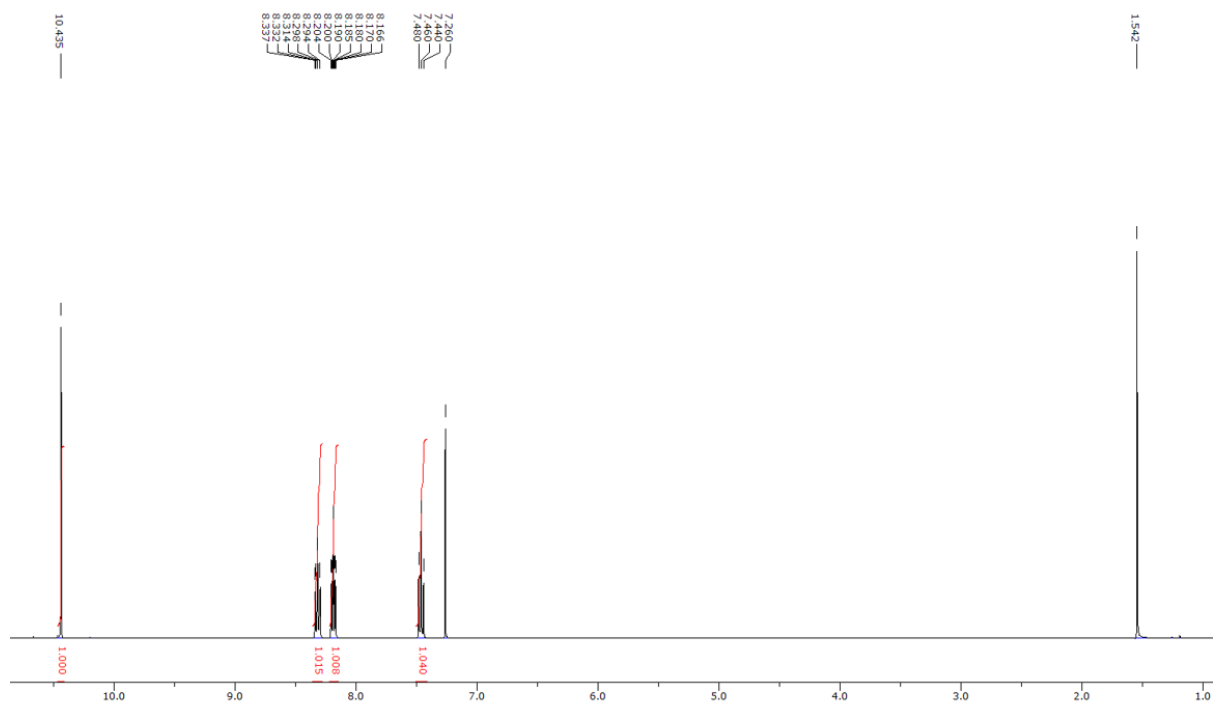

**Fig S23:**  $^1\text{H}$  NMR ( $\text{CDCl}_3$ ) of isolated product **5f**.
